# Supplementary material
Source: PubMed Central journal article supplement (PMC4148808)
Supplement: AEM.00719-14_zam999105535so1.pdf [file AEM.00719-14_zam999105535so1.pdf]

**Supporting information**

for

**Carbohydrate Catabolism**

**in *Phaeobacter inhibens* DSM 17395,**

**Member of the Marine *Roseobacter* Clade**

# Content

|                                                                                                                                                                                            |    |
|--------------------------------------------------------------------------------------------------------------------------------------------------------------------------------------------|----|
| Proteomic and metabolomics datasets.....                                                                                                                                                   | 1  |
| Growth of <i>P. inhibens</i> DSM 17395 with carbohydrates (TABLE S1, FIG S1).....                                                                                                          | 2  |
| Proteogenomics-based refinement of carbohydrate catabolism in <i>P. inhibens</i> DSM 17395 (TABLEs S2 & S3).....                                                                           | 4  |
| Proteins of <i>P. inhibens</i> DSM 17395 constituting the central metabolism, parts of amino acid biosynthesis and the urea cycle as schematically outlined in FIG 1 (TABLE S4).....       | 7  |
| Carbohydrate-specific degradation pathways in <i>P. inhibens</i> DSM 17395 (FIGs. S2–S6).....                                                                                              | 9  |
| 1. <i>N</i> -Acetylglucosamine degradation (FIG S2).....                                                                                                                                   | 9  |
| 2. Mannitol degradation (FIG S3).....                                                                                                                                                      | 11 |
| 3. Sucrose degradation (FIG S4).....                                                                                                                                                       | 13 |
| 4. Glucose degradation (FIG S5).....                                                                                                                                                       | 16 |
| 5. Xylose degradation (FIG S6).....                                                                                                                                                        | 18 |
| Intra- and extracellular metabolites of <i>P. inhibens</i> DSM 17395 identified in this study (TABLEs S5 & S6).....                                                                        | 20 |
| Sensory/regulatory proteins related to carbohydrate catabolism in <i>P. inhibens</i> DSM 17395 (TABLE S6).....                                                                             | 23 |
| Comparative genome analysis to study the relevance of the studied carbohydrate degradation pathways within <i>Rhodobacterales</i> and other heterotrophic bacteria (TABLE S7, FIG S7)..... | 24 |
| SDS-PAGE gels of outer and cytoplasmic membrane protein-enriched and soluble fractions (FIG S8).....                                                                                       | 27 |
| Central metabolism in <i>P. inhibens</i> DSM 17395 (FIGs. S8–S11).....                                                                                                                     | 28 |
| 1. Entner-Doudoroff pathway and lower branch of Embden-Meyerhof-Parnas pathway (FIG S9)..                                                                                                  | 28 |
| 2. Pentose phosphate pathway (FIG S10).....                                                                                                                                                | 30 |
| 3. Pyruvate dehydrogenase complex and TCA cycle (FIG S11).....                                                                                                                             | 32 |
| 4. Gluconeogenesis (FIG S12).....                                                                                                                                                          | 34 |
| References.....                                                                                                                                                                            | 36 |

## **Proteomic and metabolomics datasets**

Four different proteomic techniques were applied, resulting in the overall identification of 1351 different proteins: (i) 2D DIGE analysis revealed 369 regulated soluble proteins (fold change  $\geq 1.5$ ), which are represented by 409 spots. (ii) Shotgun analysis yielded 932 proteins. (iii) From the SDS PAGE-resolved, cytoplasmic membrane protein-enriched fractions, 614 proteins were identified; 245 of which contain at least one predicted transmembrane helix. (iv) The outer membrane protein-enriched fractions were also separated via SDS PAGE and yielded 141 identified proteins.

Furthermore, 116 intracellular metabolites were detected and identified (Table 2; Supplementary Table S5).

---

**Growth of *P. inhibens* DSM 17395 with carbohydrates (TABLE S1, FIG S1)**

**TABLE S1** Growth of *P. inhibens* DSM 17395 with different carbohydrates.

| Carbohydrate                | Concentration<br>[mM]<br>(1 mg/ml) | Growth<br>observed <sup>a</sup> |
|-----------------------------|------------------------------------|---------------------------------|
| Arabinose                   | 6.7                                | -                               |
| Cellobiose                  | 2.9                                | +                               |
| Fructose                    | 5.6                                | +                               |
| Fucose                      | 6.1                                | -                               |
| Galactose                   | 5.6                                | +                               |
| Glucose                     | 5.6                                | +                               |
| Lactose                     | 2.9                                | -                               |
| Maltose                     | 2.9                                | +                               |
| Mannitol                    | 5.5                                | +                               |
| Mannose                     | 5.6                                | +                               |
| <i>N</i> -Acetylglucosamine | 4.5                                | +                               |
| Rhamnose                    | 6.1                                | -                               |
| Ribose                      | 6.7                                | +                               |
| Sorbitol                    | 5.5                                | +                               |
| Starch                      | 6.1                                | -                               |
| Sucrose                     | 2.9                                | +                               |
| Trehalose                   | 2.9                                | +                               |
| Xylose                      | 6.7                                | +                               |

<sup>a</sup>The same results were observed in a Biolog experiment, except that results for L- and D-arabinose, as well as D-fucose were positive.

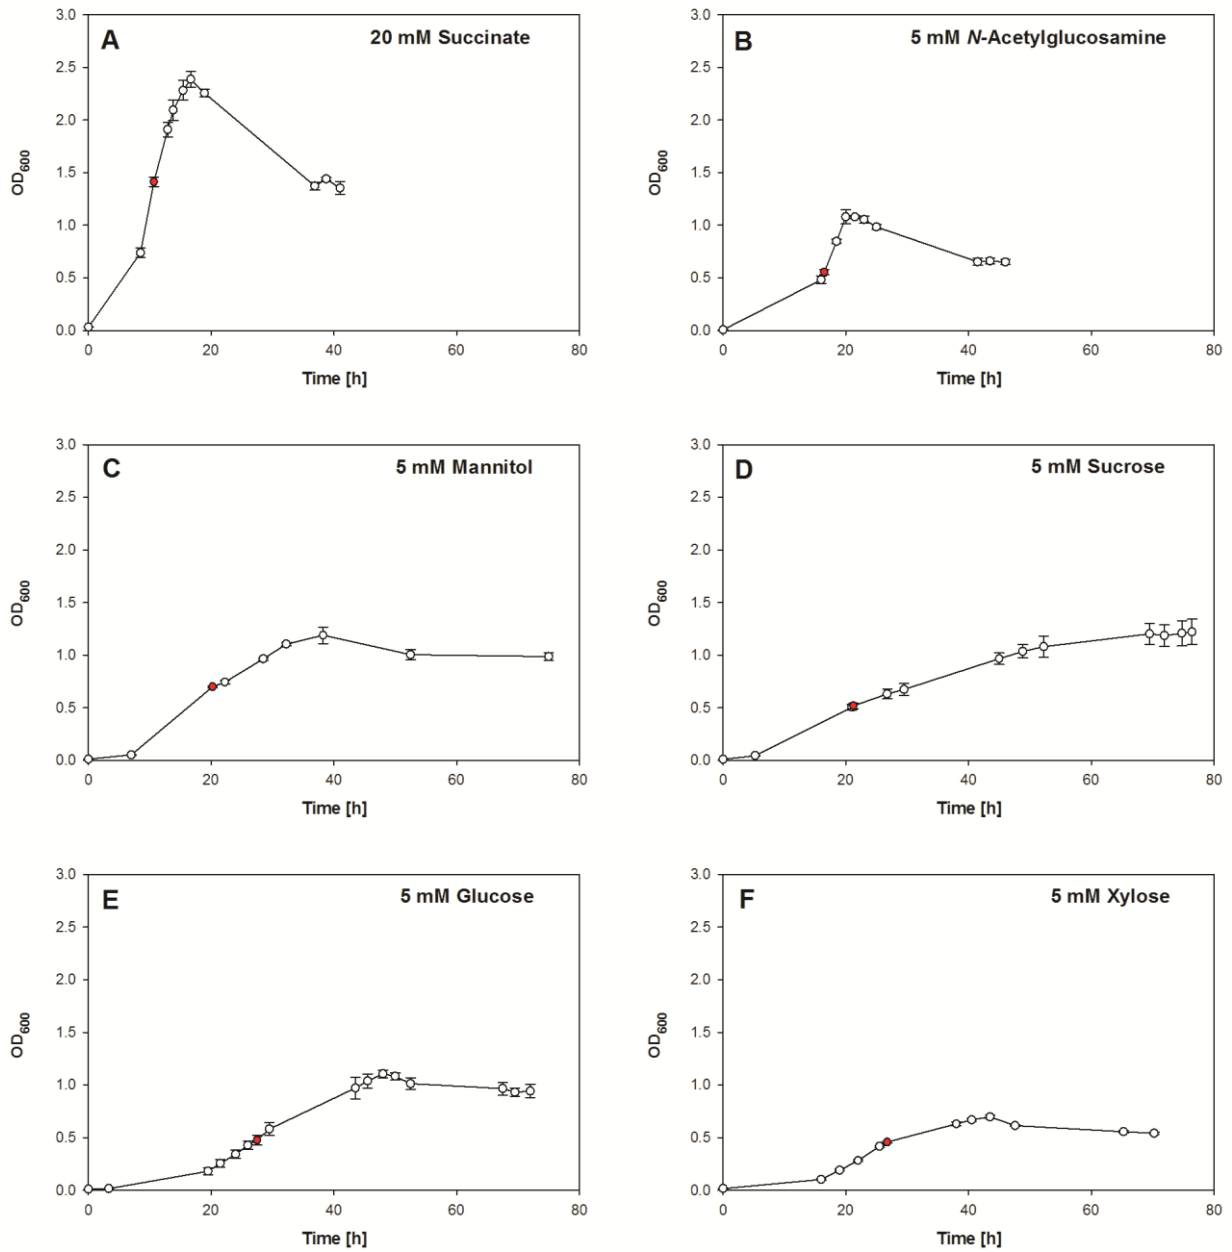

**FIG S1** Growth curves of *P. inhibens* DSM 17395 with succinate and the five selected carbohydrates. Growth was monitored by measuring the optical density (OD) at 600 nm. Harvesting time points for proteomic and metabolomic analyses are marked in red.

## Proteogenomics-based refinement of carbohydrate catabolism in *P. inhibens* DSM 17395 (TABLEs S2 & S3)

**TABLE S2** Number of proteins assigned to the transport, regulation and degradation of the five selected carbohydrates in *P. inhibens* DSM 17395 based on the original genome annotation and their proteogenomics-based refinement in this study.

| Degradation pathway for      | Genome-based prediction <sup>a</sup> :<br>Sum of proteins | This study:                 |                                     |                              |                                           | Sum of proteins |
|------------------------------|-----------------------------------------------------------|-----------------------------|-------------------------------------|------------------------------|-------------------------------------------|-----------------|
|                              |                                                           | Predicted only <sup>a</sup> | Predicted <sup>a</sup> & identified | Newly predicted <sup>b</sup> | Newly predicted <sup>b</sup> & identified |                 |
| <i>N</i> -Acetyl-glucosamine | <b>2</b>                                                  |                             | 2                                   |                              | 7                                         | <b>9</b>        |
| Mannitol                     | <b>2</b>                                                  |                             | 2                                   |                              | 5                                         | <b>7</b>        |
| Sucrose                      | <b>2</b>                                                  |                             | 2                                   | 1                            | 5                                         | <b>8</b>        |
| Glucose                      | <b>3</b>                                                  |                             | 3                                   | 1                            | 1                                         | <b>5</b>        |
| Xylose                       | <b>4</b>                                                  |                             | 4                                   | 1                            | 1                                         | <b>6</b>        |
| All                          | <b>13</b>                                                 |                             | 13                                  | 3                            | 19                                        | <b>35</b>       |
| All (non-redundant)          | <b>9</b>                                                  |                             | 9                                   | 2                            | 19                                        | <b>30</b>       |

<sup>a</sup> Based on the original genome annotation: carbohydrate degradation to intermediates of central metabolism, i.e. glucose-6-phosphate, fructose-6-phosphate or xylulose-5-phosphate (Thole *et al.*, 2012).

<sup>b</sup> See Material and Methods.

**TABLE S3** Compilation of genes of *P. inhibens* DSM 17395 with reannotated or refined functional prediction.

| Acc. no.                        | Protein ID |       | Predicted protein function                                  |                                                                        | Relevant domains                                                            | BLASTP hit used for reannotation     |           |              |
|---------------------------------|------------|-------|-------------------------------------------------------------|------------------------------------------------------------------------|-----------------------------------------------------------------------------|--------------------------------------|-----------|--------------|
|                                 | old        | new   | old                                                         | new                                                                    |                                                                             | Organism                             | E-value   | Acc.no.      |
| <b>TRANSPORT</b>                |            |       |                                                             |                                                                        |                                                                             |                                      |           |              |
| <b>N-Acetylglucosamine</b>      |            |       |                                                             |                                                                        |                                                                             |                                      |           |              |
| PGA1_c27930                     |            |       | Putative sugar ABC transporter, periplasmic binding protein | N-Acetylglucosamine ABC transporter, periplasmic sugar-binding protein | IPR006061                                                                   | <i>Loktanelia cinnabarina</i>        | 0.00E+00  | WP_021694556 |
| PGA1_c27940                     |            |       | ABC transporter permease protein                            | N-Acetylglucosamine ABC transporter, permease                          | IPR000515                                                                   | <i>Loktanelia cinnabarina</i>        | 0.00E+00  | WP_021694555 |
| PGA1_c27950                     |            |       | ABC transporter permease protein                            | N-Acetylglucosamine ABC transporter, permease                          | IPR000515                                                                   | <i>Loktanelia cinnabarina</i>        | 5.00E-172 | WP_021694554 |
| PGA1_c27970                     | SmoK       |       | ATP-binding transport protein                               | N-Acetylglucosamine ABC transporter, ATP-binding protein               | IPR003439, IPR003593, IPR008995, IPR012340, IPR013611, IPR017871, IPR027417 | <i>Loktanelia cinnabarina</i>        | 3.30E-160 | WP_021694552 |
| <b>Mannitol</b>                 |            |       |                                                             |                                                                        |                                                                             |                                      |           |              |
| PGA1_c13180                     |            | SmoK  | ABC transporter, ATP binding protein                        | Mannitol ABC transporter, ATP-binding protein                          | IPR003439, IPR003593, IPR008995, IPR012340, IPR013611, IPR017871, IPR027417 | <i>Roseobacter litoralis</i> Och 149 | 0.00E+00  | YP_004691600 |
| PGA1_c13190                     |            |       | ABC transporter permease protein                            | Mannitol ABC transporter, permease                                     | IPR000515                                                                   | <i>Roseobacter litoralis</i> Och 149 | 2.00E-173 | YP_004691601 |
| PGA1_c13200                     |            |       | ABC transporter permease protein                            | Mannitol ABC transporter, permease                                     | IPR000515                                                                   | <i>Roseobacter litoralis</i> Och 149 | 2.00E-174 | YP_004691602 |
| PGA1_c13210                     |            |       | Extracellular solute-binding protein                        | Mannitol ABC transporter, periplasmic sugar-binding protein            | IPR006059                                                                   | <i>Roseobacter litoralis</i> Och 149 | 0.00E+00  | YP_004691603 |
| <b>Sucrose</b>                  |            |       |                                                             |                                                                        |                                                                             |                                      |           |              |
| PGA1_c07860                     | AglE       |       | Alpha-glucosides-binding periplasmic protein                | Alpha-glucoside ABC transporter, periplasmic sugar-binding protein     |                                                                             |                                      |           |              |
| PGA1_c07870                     | AglF       |       | Alpha-glucoside transport system permease protein           | Alpha-glucoside ABC transporter, permease                              |                                                                             |                                      |           |              |
| PGA1_c07880                     | AglG       |       | Alpha-glucoside transport system permease protein           | Alpha-glucoside ABC transporter, permease                              |                                                                             |                                      |           |              |
| PGA1_c07900                     | AglK       |       | Alpha-glucoside transport ATP-binding protein               | Alpha-glucoside ABC transporter, ATP-binding protein                   |                                                                             |                                      |           |              |
| <b>Xylose, glucose, sucrose</b> |            |       |                                                             |                                                                        |                                                                             |                                      |           |              |
| PGA1_262p00430                  | XylF       |       | D-xylose-binding periplasmic prote                          | Xylose ABC transporter, periplasmic sugar-binding protein              |                                                                             |                                      |           |              |
| PGA1_262p00440                  | XylH       |       | Xylose transport system permease protein                    | Xylose ABC transporter, permease                                       |                                                                             |                                      |           |              |
| PGA1_262p00450                  | XylG       |       | Sugar ABC transporter ATP-binding protein                   | Xylose ABC transporter, ATP-binding protein                            | IPR003439, IPR003593, IPR027417                                             | <i>Rhodobacter</i> sp. AKP1          | 1.00E-144 | WP_009563216 |
| <b>Fructose</b>                 |            |       |                                                             |                                                                        |                                                                             |                                      |           |              |
| PGA1_c28030                     | FrcK       |       | Hypothetical protein                                        | Fructose ABC transporter, kinase                                       | IPR027417                                                                   | <i>Ruegeria</i> sp. R11              | 6.00E-100 | WP_008560036 |
| PGA1_c28040                     | FrcA       |       | ABC transporter ATP-binding protein                         | Fructose ABC transporter, ATP-binding protein                          | IPR003439, IPR003593, IPR027417                                             | <i>Thalassobacter arenae</i>         | 5.00E-158 | WP_021101677 |
| PGA1_c28050                     | FrcC       |       | Putative sugar transport system, permease protein           | Fructose ABC transporter, permease                                     | IPR018510                                                                   | <i>Thalassobacter arenae</i>         | 5.00E-178 | WP_021101676 |
| PGA1_c28060                     | FrcB       |       | Putative sugar transport system, periplasmic protein        | Fructose ABC transporter, periplasmic sugar-binding protein            | IPR025997, IPR028082                                                        | <i>Thalassobacter arenae</i>         | 0.00E+00  | WP_021101675 |
| <b>Succinate</b>                |            |       |                                                             |                                                                        |                                                                             |                                      |           |              |
| PGA1_c20660                     | DctM5      | DctM6 | TRAP transporter, subunit DctM                              | TRAP transporter, transmembrane subunit                                |                                                                             |                                      |           |              |
| PGA1_c20670                     | DctQ4      | DctQ6 | TRAP transporter, subunit                                   | TRAP transporter, transmembrane subunit                                |                                                                             |                                      |           |              |
| PGA1_c20680                     | DctP3      | DctP6 | C4-Dicarboxylate-binding periplasmic protein                | TRAP transporter, periplasmic solute-binding protein                   |                                                                             |                                      |           |              |

continued on following page

TABLE S3 continued

| Acc. no.                              | Protein ID |       | Predicted protein function                                                      |                                          | Relevant domains                | BLASTP hit used for reannotation        |           |              |
|---------------------------------------|------------|-------|---------------------------------------------------------------------------------|------------------------------------------|---------------------------------|-----------------------------------------|-----------|--------------|
|                                       | old        | new   | old                                                                             | new                                      |                                 | Organism                                | E-value   | Acc.no.      |
| <b>CARBOHYDRATE METABOLISM</b>        |            |       |                                                                                 |                                          |                                 |                                         |           |              |
| <i>N-Acetylglucosamine</i>            |            |       |                                                                                 |                                          |                                 |                                         |           |              |
| PGA1_c27890                           |            | NagB  | Putative hexosephosphate binding protein                                        | Glucosamine-6-phosphate deaminase        | IPR001347                       | <i>Ruegeria</i> sp. TW15                | 3.00E-148 | WP_010439364 |
| PGA1_c27910                           |            | NagK  | Putative ATPase, BadF/BadG/BcrA/BcrD type                                       | <i>N</i> -Acetylglucosamine kinase       | IPR002731                       | <i>Roseobacter denitrificans</i> OCh114 | 2.00E-48  | YP_682036    |
| <b>Sucrose</b>                        |            |       |                                                                                 |                                          |                                 |                                         |           |              |
| PGA1_c111850                          |            | PspA  | Hypothetical protein                                                            | Phage shock protein A                    | IPR007157                       | <i>Jannaschia</i> sp. CCS1              | 2.00E-67  | YP_510935    |
| <b>CENTRAL METABOLISM</b>             |            |       |                                                                                 |                                          |                                 |                                         |           |              |
| <i>Pyruvate dehydrogenase complex</i> |            |       |                                                                                 |                                          |                                 |                                         |           |              |
| PGA1_c17550                           |            | PdhA  | Pyruvate dehydrogenase, E1 component alpha subunit                              | Pyruvate dehydrogenase, E1 alpha subunit |                                 |                                         |           |              |
| PGA1_c17560                           |            | PdhB  | Pyruvate dehydrogenase, E1 component beta subunit                               | Pyruvate dehydrogenase, E1 beta subunit  |                                 |                                         |           |              |
| PGA1_c17570                           |            | PdhC  | Pyruvate dehydrogenase, dihydrolipoyllysine-residue acetyltransferase component | Pyruvate dehydrogenase, E2               |                                 |                                         |           |              |
| PGA1_c17390                           | LpdA       | LpdA1 | Dihydrolipoyl dehydrogenase LpdA                                                | Dihydrolipoyl dehydrogenase              |                                 |                                         |           |              |
| <i>TCA cycle</i>                      |            |       |                                                                                 |                                          |                                 |                                         |           |              |
| PGA1_c16970                           |            | GlhA  | Citrate synthase GlhA                                                           | Citrate synthase                         |                                 |                                         |           |              |
| PGA1_c03600                           |            | SucA  | 2-Oxoglutarate dehydrogenase, E1 component SucA                                 | 2-Oxoglutarate dehydrogenase, E1         |                                 |                                         |           |              |
| PGA1_c03550                           |            | Lpd2  | Dihydrolipoyl dehydrogenase 2                                                   | Dihydrolipoyl dehydrogenase              |                                 |                                         |           |              |
| <b>SENSORY/REGULATORY PROTEINS</b>    |            |       |                                                                                 |                                          |                                 |                                         |           |              |
| <i>N-Acetylglucosamine</i>            |            |       |                                                                                 |                                          |                                 |                                         |           |              |
| PGA1_c27900                           |            |       | Ligand-binding UTRA domain-containing protein                                   | GntR family transcriptional regulator    | IPR000524, IPR011663, IPR011991 | <i>Ruegeria pomeroyi</i> DSS-3          | 5.00E-134 | YP_167079    |
| <b>Sucrose</b>                        |            |       |                                                                                 |                                          |                                 |                                         |           |              |
| PGA1_c07850                           |            | AlgR  | Transcriptional regulator, lacI family                                          |                                          | IPR000843, IPR010982, IPR028082 | <i>Sinorhizobium fredii</i> USDA 257    | 3.00E-81  | YP_006395698 |
| <b>Fructose</b>                       |            |       |                                                                                 |                                          |                                 |                                         |           |              |
| PGA1_c28070                           |            | FcrR  | MarR family transcriptional regulator                                           |                                          | IPR027417                       | <i>Sinorhizobium meliloti</i> SM11      | 7.00E-115 | YP_005718659 |



# Proteins of *P. inhibens* DSM 17395 constituting the central metabolism, parts of amino acid biosynthesis and the urea cycle as schematically outlined in FIG 1 (TABLE S4)

**TABLE S4** Proteins of *P. inhibens* DSM 17395 constituting the central metabolism, parts of amino acid biosynthesis and the urea cycle as schematically outlined in Fig. 1. Proteins were identified from 2DE gels (2D DIGE), by shotgun analysis (S), from SDS-PAGE resolved cytoplasmic membrane protein-enriched fractions (CM) and from SDS-PAGE resolved outer membrane protein-enriched fractions (OM). Abbreviations of substrates: NAG, *N*-acetylglucosamine; MTL, mannitol; SUCR, sucrose; GLC, glucose; XYL, xylose; Succ, succinate

| Acc. No. (PGAL)                                       | Name                | Predicted function                                       | Fold change <sup>a</sup> in abundance (2D DIGE) |      |      |      |      |      |      |    |    |     |    |    | Mascot score (gel-free analysis) |    |    |      |    |    |  |      |    |  |  |  |
|-------------------------------------------------------|---------------------|----------------------------------------------------------|-------------------------------------------------|------|------|------|------|------|------|----|----|-----|----|----|----------------------------------|----|----|------|----|----|--|------|----|--|--|--|
|                                                       |                     |                                                          | NAG                                             |      |      | MTL  |      |      | SUCR |    |    | GLC |    |    | XYL                              |    |    | Succ |    |    |  |      |    |  |  |  |
|                                                       |                     |                                                          | S                                               | CM   | OM   | S    | CM   | OM   | S    | CM | OM | S   | CM | OM | S                                | CM | OM | S    | CM | OM |  |      |    |  |  |  |
| <b>CENTRAL METABOLISM</b>                             |                     |                                                          |                                                 |      |      |      |      |      |      |    |    |     |    |    |                                  |    |    |      |    |    |  |      |    |  |  |  |
| <i>Enter-Doudoroff pathway</i>                        |                     |                                                          |                                                 |      |      |      |      |      |      |    |    |     |    |    |                                  |    |    |      |    |    |  |      |    |  |  |  |
| c27980                                                | Pgi                 | Glucose-6-phosphate isomerase                            |                                                 |      |      |      |      |      |      |    |    |     |    |    |                                  |    |    |      |    |    |  |      |    |  |  |  |
| c27990                                                | Zwf2                | Glucose-6-phosphate 1-dehydrogenase                      |                                                 |      |      |      |      |      |      |    |    |     |    |    |                                  |    |    |      |    |    |  |      |    |  |  |  |
| c15170                                                | Pgi1                | 6-Phosphogluconolactonase                                |                                                 |      |      |      |      |      |      |    |    |     |    |    |                                  |    |    |      |    |    |  |      |    |  |  |  |
| c28000                                                | Eda <sup>b</sup>    | Phosphogluconate dehydratase <sup>b</sup>                | 8.6                                             | 6.5  | 9.0  | 9.3  | 6.5  | 5.29 |      |    |    |     |    |    |                                  |    |    |      |    |    |  | 1.66 |    |  |  |  |
| c28010                                                | Eda                 | KHG/KDPG aldolase                                        | 1.4                                             | 1.7  | 2.1  | 1.9  | 1.0  | 4.47 |      |    |    |     |    |    |                                  |    |    |      |    |    |  |      | 72 |  |  |  |
| <i>Lower branch of Embden-Meyerhof Parnas pathway</i> |                     |                                                          |                                                 |      |      |      |      |      |      |    |    |     |    |    |                                  |    |    |      |    |    |  |      |    |  |  |  |
| c27490                                                | Gap <sup>b</sup>    | Glyceraldehyde-3-phosphate dehydrogenase <sup>b</sup>    | 10.7                                            | 13.6 | 14.7 | 16.6 | 16.6 | 5.19 | 75   |    |    |     |    |    |                                  |    |    |      |    |    |  |      |    |  |  |  |
| c17530                                                | Pgk                 | Phosphoglycerate kinase                                  |                                                 |      |      |      |      | 26.4 |      |    |    |     |    |    |                                  |    |    |      |    |    |  |      |    |  |  |  |
| c02770                                                | Gpm1                | 2,3-Bisphosphoglycerate-indep.phosphoglycerate mutase    |                                                 |      |      |      |      | 137  |      |    |    |     |    |    |                                  |    |    |      |    |    |  |      |    |  |  |  |
| c11420                                                | Eno <sup>b</sup>    | Enolase <sup>b</sup>                                     | 2.0                                             | 2.4  | 2.6  | 2.3  | 3.1  | 1109 |      |    |    |     |    |    |                                  |    |    |      |    |    |  |      |    |  |  |  |
| c06970                                                | PykA                | Pyruvate kinase                                          |                                                 |      |      |      |      | 268  | 56   |    |    |     |    |    |                                  |    |    |      |    |    |  |      |    |  |  |  |
| <i>Pentose phosphate pathway</i>                      |                     |                                                          |                                                 |      |      |      |      |      |      |    |    |     |    |    |                                  |    |    |      |    |    |  |      |    |  |  |  |
| c23740                                                | RpiA                | Ribose-5-phosphate isomerase A                           |                                                 |      |      |      |      | 97   |      |    |    |     |    |    |                                  |    |    |      |    |    |  |      |    |  |  |  |
| c17230                                                | TkA <sup>b</sup>    | Transketolase <sup>b</sup>                               | -1.3                                            | -1.4 | -1.7 | -1.3 | 1.2  | 743  |      |    |    |     |    |    |                                  |    |    |      |    |    |  |      |    |  |  |  |
| c05780                                                | Tal                 | Transaldolase                                            |                                                 |      |      |      |      | 814  |      |    |    |     |    |    |                                  |    |    |      |    |    |  |      |    |  |  |  |
| <i>Pyruvate dehydrogenase complex</i>                 |                     |                                                          |                                                 |      |      |      |      |      |      |    |    |     |    |    |                                  |    |    |      |    |    |  |      |    |  |  |  |
| c17550                                                | PdhA                | Pyruvate dehydrogenase, E1 alpha subunit <sup>c</sup>    | -1.3                                            | -1.0 | 1.1  | -1.1 | -1.6 | 237  |      |    |    |     |    |    |                                  |    |    |      |    |    |  |      |    |  |  |  |
| c17560                                                | PdhB <sup>bc</sup>  | Pyruvate dehydrogenase, E1 beta subunit <sup>bc</sup>    |                                                 |      |      |      |      | 344  |      |    |    |     |    |    |                                  |    |    |      |    |    |  |      |    |  |  |  |
| c17570                                                | PdhC <sup>bc</sup>  | Pyruvate dehydrogenase, E2 <sup>bc</sup>                 |                                                 |      |      |      |      | 419  |      |    |    |     |    |    |                                  |    |    |      |    |    |  |      |    |  |  |  |
| c17390                                                | LpdA1 <sup>bc</sup> | Dihydrolipoyl dehydrogenase <sup>bc</sup>                | -2.3                                            | 1.1  | 1.4  | -1.1 | -1.8 | 156  |      |    |    |     |    |    |                                  |    |    |      |    |    |  |      |    |  |  |  |
| <i>TCA cycle</i>                                      |                     |                                                          |                                                 |      |      |      |      |      |      |    |    |     |    |    |                                  |    |    |      |    |    |  |      |    |  |  |  |
| c16970                                                | Gha1 <sup>c</sup>   | Citrate synthase                                         |                                                 |      |      |      |      | 230  |      |    |    |     |    |    |                                  |    |    |      |    |    |  |      |    |  |  |  |
| c18830                                                | AcnA                | Aconitate hydratase                                      | 1.6                                             | -1.3 | 1.2  | -1.0 | 1.6  | 1061 | 58   |    |    |     |    |    |                                  |    |    |      |    |    |  |      |    |  |  |  |
| c28340                                                | Icd <sup>b</sup>    | Isocitrate dehydrogenase [NADP] <sup>b</sup>             | 1.6                                             | -1.3 | -1.1 | -1.4 | -1.0 | 1533 |      |    |    |     |    |    |                                  |    |    |      |    |    |  |      |    |  |  |  |
| c03590                                                | SucB                | 2-Oxoglutarate dehydrogenase, E2                         |                                                 |      |      |      |      | 673  |      |    |    |     |    |    |                                  |    |    |      |    |    |  |      |    |  |  |  |
| c03600                                                | SucA                | 2-Oxoglutarate dehydrogenase, E1                         |                                                 |      |      |      |      | 454  |      |    |    |     |    |    |                                  |    |    |      |    |    |  |      |    |  |  |  |
| c03550                                                | Lpd2                | Dihydrolipoyl dehydrogenase                              |                                                 |      |      |      |      | 280  |      |    |    |     |    |    |                                  |    |    |      |    |    |  |      |    |  |  |  |
| c03610                                                | SucD                | Succinyl-CoA ligase [ADP-forming], subunit alpha         |                                                 |      |      |      |      | 598  | 51   |    |    |     |    |    |                                  |    |    |      |    |    |  |      |    |  |  |  |
| c03630                                                | SucC                | Succinyl-CoA ligase [ADP-forming], subunit beta          |                                                 |      |      |      |      | 1000 |      |    |    |     |    |    |                                  |    |    |      |    |    |  |      |    |  |  |  |
| c03740                                                | SdhC                | Succinate dehydrogenase, cytochrome <i>b</i> 556 subunit | -1.3                                            | -1.5 | 1.1  | -1.6 | -1.7 |      | 36   |    |    |     |    |    |                                  |    |    |      |    |    |  |      |    |  |  |  |
| c03760                                                | SdhA                | Succinate dehydrogenase, flavoprotein subunit            |                                                 |      |      |      |      | 66.4 | 32   |    |    |     |    |    |                                  |    |    |      |    |    |  |      |    |  |  |  |
| c03780                                                | SdhB                | Succinate dehydrogenase, iron-sulfur subunit             |                                                 |      |      |      |      | 23.4 |      |    |    |     |    |    |                                  |    |    |      |    |    |  |      |    |  |  |  |
| c13520                                                | FumC                | Fumarate hydratase, iron-sulfur subunit                  |                                                 |      |      |      |      | 64.4 |      |    |    |     |    |    |                                  |    |    |      |    |    |  |      |    |  |  |  |
| c03650                                                | Mdh                 | Malate dehydrogenase                                     | -1.0                                            | 1.0  | 1.1  | 1.1  | 1.6  | 1300 |      |    |    |     |    |    |                                  |    |    |      |    |    |  |      |    |  |  |  |

continued on following page

TABLE S4 continued

| Acc. No.<br>(PGAL)                          | Name              | Predicted function                                          | Mascot score (gel-free analysis)                   |      |      |      |      |      |              |     |      |      |      |      |      |      |     |      |     |     |     |
|---------------------------------------------|-------------------|-------------------------------------------------------------|----------------------------------------------------|------|------|------|------|------|--------------|-----|------|------|------|------|------|------|-----|------|-----|-----|-----|
|                                             |                   |                                                             | Fold change <sup>a</sup> in abundance<br>(2D DIGE) |      |      |      |      |      | Mascot score |     |      |      |      |      |      |      |     |      |     |     |     |
|                                             |                   |                                                             | NAG                                                | MTL  | SUCR | GLC  | XYL  | Succ | NAG          | MTL | SUCR | GLC  | XYL  | Succ |      |      |     |      |     |     |     |
| S                                           | CM                | OM                                                          | S                                                  | CM   | OM   | S    | CM   | OM   | S            | CM  | OM   | S    | CM   | OM   |      |      |     |      |     |     |     |
| <b>CENTRAL METABOLISM</b>                   |                   |                                                             |                                                    |      |      |      |      |      |              |     |      |      |      |      |      |      |     |      |     |     |     |
| <i>Gluconogenesis</i>                       |                   |                                                             |                                                    |      |      |      |      |      |              |     |      |      |      |      |      |      |     |      |     |     |     |
| c09420                                      | Pyc <sup>b</sup>  | Pyruvate carboxylase <sup>b</sup>                           | 1.1                                                | -1.3 | -1.3 | -1.5 | -1.2 | 1815 | 1081         | 857 | 526  | 1365 | 881  | 186  | 1258 | 632  | 33  | 1248 | 508 | 33  |     |
| c01140                                      | PckA <sup>b</sup> | Phosphoenolpyruvate carboxykinase <sup>b</sup>              | -4.0                                               | -3.4 | -3.0 | -2.9 | -3.6 | 203  | 1487         | 484 | 36   | 266  | 1411 | 41   | 172  | 1541 | 711 | 722  | 711 | 711 |     |
| c11420                                      | Ere <sup>b</sup>  | Enolase <sup>b</sup>                                        | 2.0                                                | 2.4  | 2.6  | 2.3  | 3.1  | 1409 | 1109         | 949 | 36   | 159  | 77   | 404  | 312  | 436  | 436 | 436  | 436 | 436 |     |
| c02770                                      | GpmI              | 2,3-bisphosphoglycerate-independent phosphoglycerate mutase |                                                    |      |      |      |      | 137  | 350          | 74  | 134  | 421  |      |      |      |      |     |      |     |     |     |
| c17530                                      | Pgk               | Phosphoglycerate kinase                                     |                                                    |      |      |      |      | 264  |              |     |      |      |      |      |      |      |     |      |     |     |     |
| c17250                                      | GapB              | Glyceralddehyde-3-phosphate dehydrogenase 2                 |                                                    |      |      |      |      |      |              |     |      |      |      |      |      |      |     |      |     |     |     |
| c20650                                      | TpiA              | Triosephosphate isomerase                                   |                                                    |      |      |      |      | 193  | 344          | 249 | 249  | 357  | 357  | 260  | 260  | 260  | 260 | 260  | 260 | 260 |     |
| c23910                                      | Fda               | Fructose-bisphosphate aldolase class 1                      | -2.7                                               | -3.3 | -3.6 | -3.4 | -2.6 | 520  | 477          | 611 | 488  | 364  | 478  | 478  | 478  | 478  | 478 | 478  | 478 | 478 |     |
| c08640                                      | GlpX              | Fructose-1,6-bisphosphatase class 2                         |                                                    |      |      |      |      | 647  |              |     |      | 636  | 634  | 634  | 634  | 634  | 634 | 634  | 634 | 634 |     |
| c27980                                      | Pgi               | Glucose-6-phosphatase isomerase                             | 5.0                                                | 3.5  | 6.4  | 6.2  | 3.4  | 292  | 292          | 102 | 186  | 341  | 286  | 286  | 286  | 286  | 286 | 286  | 286 | 286 |     |
| c05420                                      | Gik               | Glucokinase                                                 |                                                    |      |      |      |      | 296  |              | 194 | 57   |      |      |      |      |      |     |      |     | 97  |     |
| <b>AMINO SUGAR METABOLISM</b>               |                   |                                                             |                                                    |      |      |      |      |      |              |     |      |      |      |      |      |      |     |      |     |     |     |
| c27920                                      | MurQ              | N-Acetylmuramate-6-phosphate etherase                       | 4.0                                                | 1.1  | 1.1  | 1.0  | 1.1  | 445  | 71           |     |      |      |      |      |      |      |     |      |     |     |     |
| <i>TDP-N-acetylglucosamine biosynthesis</i> |                   |                                                             |                                                    |      |      |      |      |      |              |     |      |      |      |      |      |      |     |      |     |     |     |
| c10230                                      | GlmS              | Glucosamine-fructose-6-phosphate aminotransferase           | -1.5                                               | 1.6  | 2.0  | 1.6  | 2.0  | 196  | 654          | 123 | 324  | 460  | 624  | 624  | 624  | 624  | 624 | 624  | 624 | 624 |     |
| c06550                                      | GlmM              | Phosphoglucosamine mutase                                   |                                                    |      |      |      |      | 223  | 461          | 164 | 314  | 133  | 449  | 91   | 562  | 562  | 562 | 562  | 562 | 562 |     |
| c10240                                      | GlmU              | Bifunctional enzyme                                         |                                                    |      |      |      |      | 40   |              |     |      |      |      |      |      |      |     |      |     | 194 |     |
| <b>AMINO ACID BIOSYNTHESIS</b>              |                   |                                                             |                                                    |      |      |      |      |      |              |     |      |      |      |      |      |      |     |      |     |     |     |
| <i>Cysteine</i>                             |                   |                                                             |                                                    |      |      |      |      |      |              |     |      |      |      |      |      |      |     |      |     |     |     |
| c17690                                      | CysE              | Serine acetyltransferase                                    | -1.7                                               | -1.6 | 1.3  | -2.3 | -2.0 | 311  | 324          | 463 | 641  | 805  | 183  | 471  | 471  | 471  | 471 | 471  | 471 | 471 |     |
| c13950                                      | CysK              | Cysteine synthase                                           | 1.1                                                | -1.5 | -1.5 | -1.5 | -1.6 | 441  | 828          | 641 |      |      |      |      |      |      |     |      |     | 707 |     |
| <i>Arginine biosynthesis and urea cycle</i> |                   |                                                             |                                                    |      |      |      |      |      |              |     |      |      |      |      |      |      |     |      |     |     |     |
| c34600                                      | ArgJ              | Arginine biosynthesis bifunctional protein                  |                                                    |      |      |      |      | 159  | 139          | 206 | 206  | 219  | 221  | 221  | 221  | 221  | 221 | 221  | 221 | 221 |     |
| c02050                                      | ArgB              | Acetylglutamate kinase                                      |                                                    |      |      |      |      | 253  | 146          |     |      | 111  |      |      |      |      |     |      |     | 187 |     |
| c17050                                      | ArgC              | N-Acetyl-gamma-glutamyl-phosphate reductase                 |                                                    |      |      |      |      |      |              |     |      |      |      |      |      |      |     |      |     | 74  |     |
| c24230                                      | ArgD              | Acetylornithine aminotransferase                            |                                                    |      |      |      |      | 163  | 163          |     |      |      |      |      |      |      |     |      |     | 74  |     |
| c24220                                      | ArgF              | Ornithine carbamoyltransferase                              |                                                    |      |      |      |      | 71   | 172          | 112 | 112  | 428  | 428  | 428  | 428  | 428  | 428 | 428  | 428 | 428 |     |
| c34920                                      | ArgG              | Argininosuccinate synthase                                  |                                                    |      |      |      |      | 444  | 549          | 355 | 355  | 386  | 186  | 169  | 297  | 474  | 363 | 122  | 248 | 270 |     |
| c18720                                      | GlnA              | Glutamine synthetase                                        |                                                    |      |      |      |      | 337  | 340          | 283 | 303  | 83   | 131  | 118  | 207  | 474  | 363 | 122  | 248 | 270 |     |
| c06670                                      | CarA              | Carbamoyl-phosphate synthase, small chain                   |                                                    |      |      |      |      | 252  | 252          | 75  | 75   | 119  | 189  | 189  | 189  | 189  | 189 | 189  | 189 | 189 |     |
| c24560                                      | CarB              | Carbamoyl-phosphate synthase, large chain                   |                                                    |      |      |      |      | 501  | 501          | 273 | 273  | 397  | 397  | 397  | 397  | 397  | 397 | 397  | 397 | 401 |     |
| <b>SORBITOL DEGRADATION</b>                 |                   |                                                             |                                                    |      |      |      |      |      |              |     |      |      |      |      |      |      |     |      |     |     |     |
| c13170                                      | PoiS              | Sorbitol dehydrogenase                                      |                                                    |      |      |      |      | 365  |              |     |      |      |      |      |      |      |     |      |     |     |     |
| <b>STRESS-ASSOCIATED</b>                    |                   |                                                             |                                                    |      |      |      |      |      |              |     |      |      |      |      |      |      |     |      |     |     |     |
| c11850                                      | PspA <sup>c</sup> | Phage shock protein A <sup>b,c</sup>                        | -2.0                                               | 8.0  | 92.1 | 5.7  | 1.4  | 847  | 770          | 203 | 1009 | 1508 | 199  | 649  | 577  | 127  | 288 | 313  | 317 | 209 | 161 |
| <b>TRANSHYDROGENASE</b>                     |                   |                                                             |                                                    |      |      |      |      |      |              |     |      |      |      |      |      |      |     |      |     |     |     |
| c10030                                      | PnaA              | NAD(P) transhydrogenase, subunit alpha                      |                                                    |      |      |      |      | 970  | 1205         | 220 | 674  | 171  | 859  | 224  | 1037 | 96   | 511 | 128  | 511 | 128 |     |
| c10040                                      | PnaB              | NAD(P) transhydrogenase, subunit beta                       |                                                    |      |      |      |      | 206  | 318          | 120 | 296  | 102  | 435  | 137  | 345  | 63   | 255 | 130  | 255 | 130 |     |

<sup>a</sup> As compared to succinate-adapted cells of *P. inhibens* DSM 17395.  
<sup>b</sup> Identified from multiple spots on a single 2DE gel.  
<sup>c</sup> For annotation refinement or full enzyme names see Supplementary TABLE S3.

## Carbohydrate-specific degradation pathways in *P. inhibens* DSM 17395 (FIGs. S2–S6)

### 1. *N*-Acetylglucosamine degradation (FIG S2)

**A**

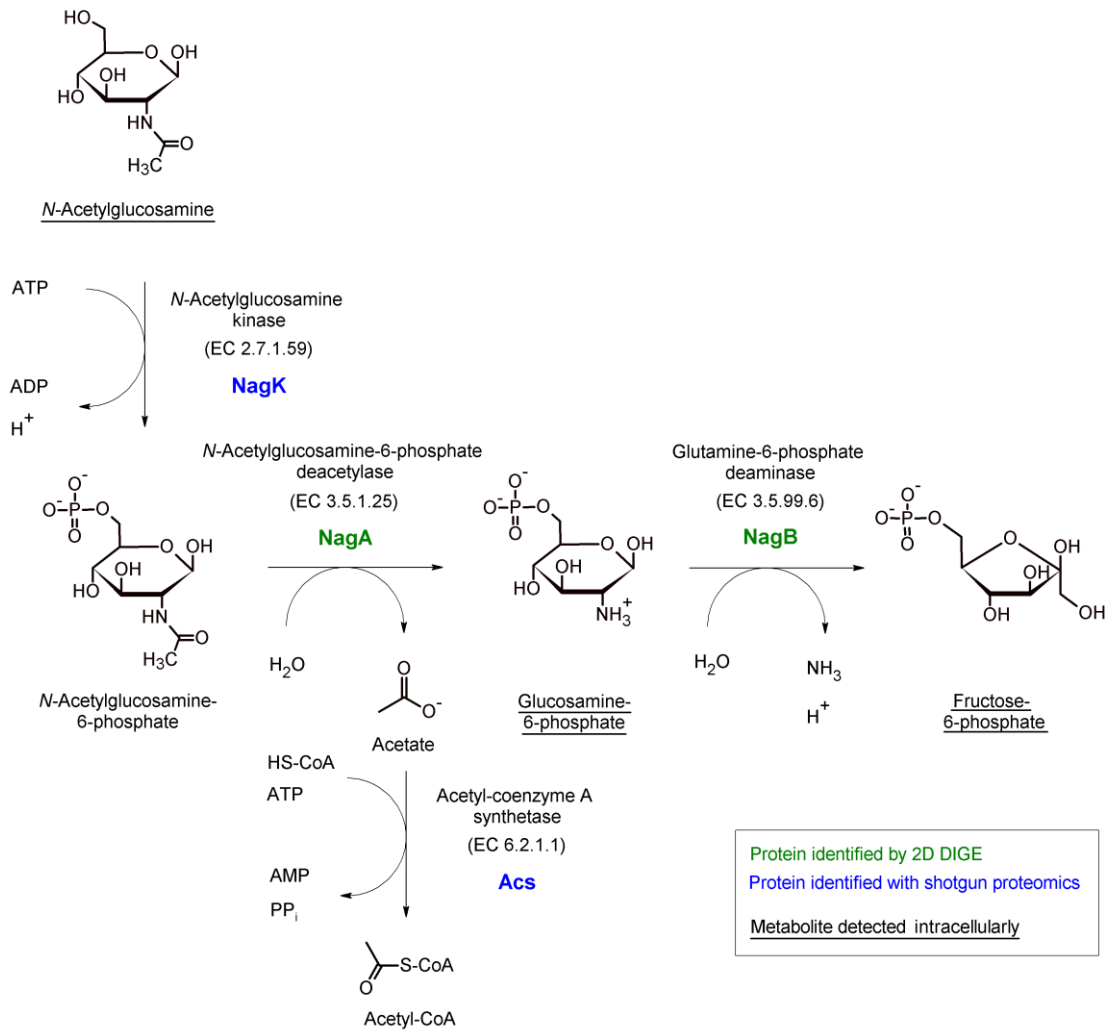

**B**

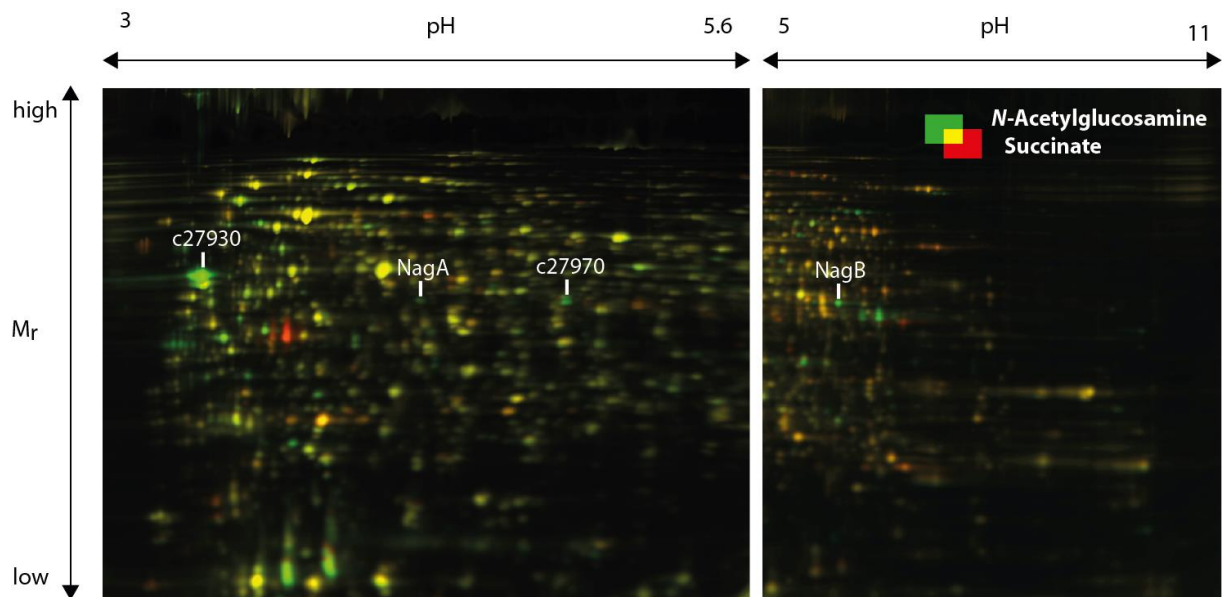

**C**

| Acc. No.<br>(PGA_)             | Name              | Predicted function                                                                          | Fold change in abundance as compared to succinate-adapted cells (2D DIGE)                                                                                                                                                    |        |      |      |       |         |         |        |        |        |       |       |        |        |
|--------------------------------|-------------------|---------------------------------------------------------------------------------------------|------------------------------------------------------------------------------------------------------------------------------------------------------------------------------------------------------------------------------|--------|------|------|-------|---------|---------|--------|--------|--------|-------|-------|--------|--------|
|                                |                   |                                                                                             | NAG                                                                                                                                                                                                                          | MTL    | SUCR | GLC  | XYL   |         |         |        |        |        |       |       |        |        |
| <b>CARBOHYDRATE METABOLISM</b> |                   |                                                                                             |                                                                                                                                                                                                                              |        |      |      |       |         |         |        |        |        |       |       |        |        |
| <i>N-Acetylglucosamine</i>     |                   |                                                                                             |                                                                                                                                                                                                                              |        |      |      |       |         |         |        |        |        |       |       |        |        |
| c27880                         | NagA              | <i>N</i> -Acetylglucosamine-6-phosphate deacetylase                                         | 3.8                                                                                                                                                                                                                          | 1.4    | -1.0 | 1.4  | -1.3  |         |         |        |        |        |       |       |        |        |
| c27890                         | NagB <sup>a</sup> | Glucosamine-6-phosphate deaminase <sup>a</sup>                                              | 15.6                                                                                                                                                                                                                         | -1.1   | -1.8 | -2.1 | -2.0  |         |         |        |        |        |       |       |        |        |
| <b>TRANSPORT</b>               |                   |                                                                                             |                                                                                                                                                                                                                              |        |      |      |       |         |         |        |        |        |       |       |        |        |
| <i>N-Acetylglucosamine</i>     |                   |                                                                                             |                                                                                                                                                                                                                              |        |      |      |       |         |         |        |        |        |       |       |        |        |
| c27930                         |                   | <i>N</i> -Acetylglucosamine ABC transporter, periplasmic sugar-binding protein <sup>a</sup> | 26.1                                                                                                                                                                                                                         | -1.5   | -4.1 | -3.4 | -3.6  |         |         |        |        |        |       |       |        |        |
| c27970                         |                   | <i>N</i> -Acetylglucosamine ABC transporter, ATP-binding protein <sup>a</sup>               | 2.4                                                                                                                                                                                                                          | -6.4   | -5.9 | -5.7 | -11.7 |         |         |        |        |        |       |       |        |        |
|                                |                   |                                                                                             | <table border="1"> <tr> <td>&lt; -30.0</td> <td>&lt; -10.0</td> <td>&lt; -5.0</td> <td>&lt; -1.5</td> </tr> <tr> <td>&gt; -1.5</td> <td>&gt; 1.5</td> <td>&gt; 5.0</td> <td>&gt; 10.0</td> <td>&gt; 35.0</td> </tr> </table> |        |      |      |       | < -30.0 | < -10.0 | < -5.0 | < -1.5 | > -1.5 | > 1.5 | > 5.0 | > 10.0 | > 35.0 |
| < -30.0                        | < -10.0           | < -5.0                                                                                      | < -1.5                                                                                                                                                                                                                       |        |      |      |       |         |         |        |        |        |       |       |        |        |
| > -1.5                         | > 1.5             | > 5.0                                                                                       | > 10.0                                                                                                                                                                                                                       | > 35.0 |      |      |       |         |         |        |        |        |       |       |        |        |

<sup>a</sup> Annotation refinement (see Supplementary TABLE S3).

**FIG S2** Proteomic data and genomic predictions for *N*-acetylglucosamine degradation and transport in *P. inhibens* DSM 17395. (A) Proposed degradation pathway. (B) False-colour 2D DIGE gel image comparing the proteome profile of *N*-acetylglucosamine-adapted cells to that of succinate-adapted cells. Identified proteins involved in the degradation and transport of *N*-acetylglucosamine are marked. (C) Protein ID, predicted function and fold change in abundance of marked proteins. Abbreviations of adaptation substrates: NAG, *N*-acetylglucosamine; MTL, mannitol; SUCR, sucrose; GLC, glucose; XYL, xylose.

## 2. Mannitol degradation (FIG S3)

**A**

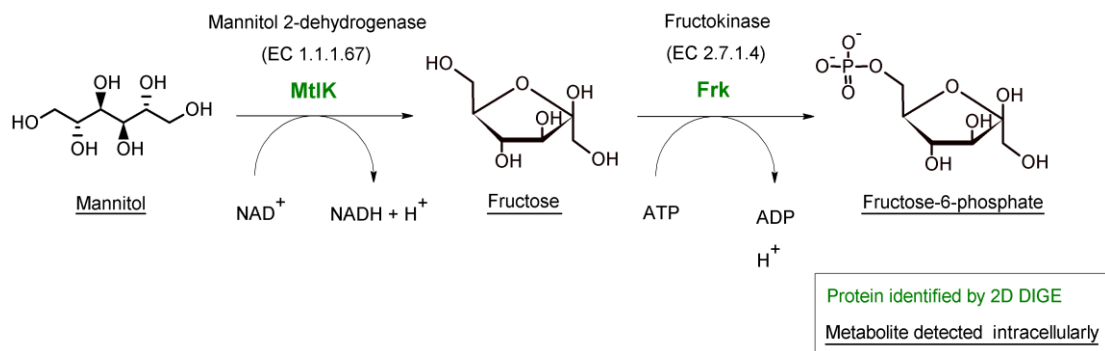

**B**

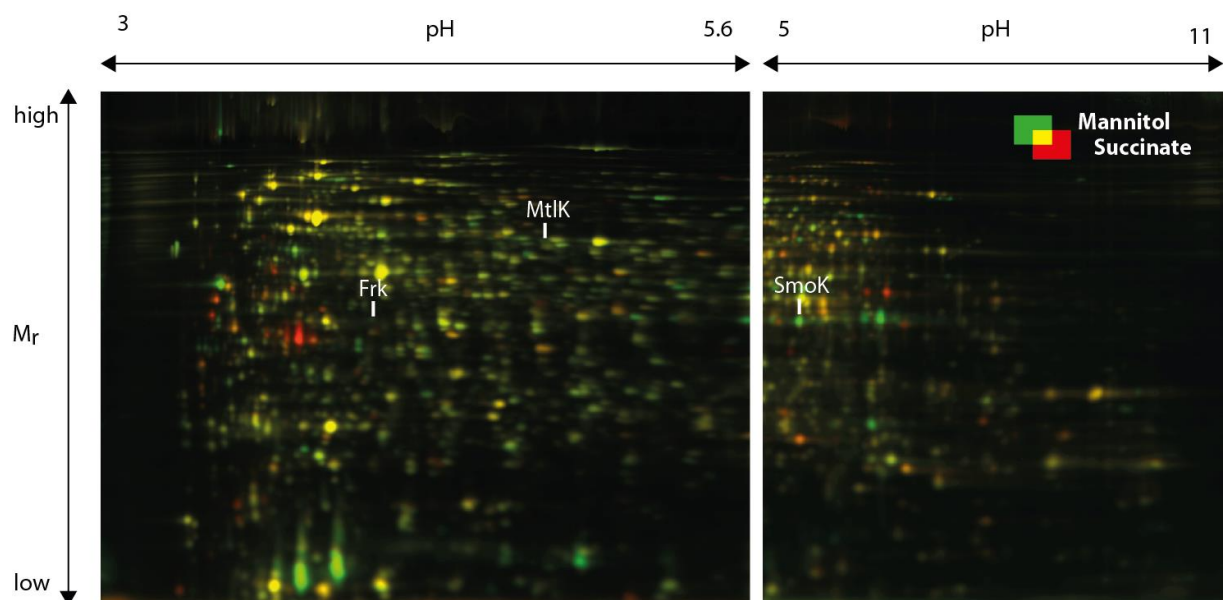

C

| Acc. No.<br>(PGA_)             | Name              | Predicted function                                         | Fold change in abundance as compared to<br>succinate-adapted cells (2D DIGE) |     |                                                                                                                                                                                |      |      |
|--------------------------------|-------------------|------------------------------------------------------------|------------------------------------------------------------------------------|-----|--------------------------------------------------------------------------------------------------------------------------------------------------------------------------------|------|------|
|                                |                   |                                                            | NAG                                                                          | MTL | SUCR                                                                                                                                                                           | GLC  | XYL  |
| <b>CARBOHYDRATE METABOLISM</b> |                   |                                                            |                                                                              |     |                                                                                                                                                                                |      |      |
| <i>Mannitol</i>                |                   |                                                            |                                                                              |     |                                                                                                                                                                                |      |      |
| c13160                         | MtlK              | Mannitol 2-dehydrogenase                                   | 1.3                                                                          | 2.5 | 1.5                                                                                                                                                                            | 1.6  | 1.7  |
| c28020                         | Frk               | Fructokinase                                               | 1.6                                                                          | 1.5 | 2.2                                                                                                                                                                            | -1.1 | 1.1  |
| <b>TRANSPORT</b>               |                   |                                                            |                                                                              |     |                                                                                                                                                                                |      |      |
| <i>Mannitol</i>                |                   |                                                            |                                                                              |     |                                                                                                                                                                                |      |      |
| c13180                         | SmoK <sup>a</sup> | Mannitol ABC transporter, ATP-binding protein <sup>a</sup> | -1.3                                                                         | 4.9 | -1.1                                                                                                                                                                           | -1.1 | -1.2 |
|                                |                   |                                                            | Fold change                                                                  |     | <div style="border: 1px solid black; padding: 2px;"> <span style="background-color: #ffff00;">&gt; -1.5</span> <span style="background-color: #00ff00;">&gt; 1.5</span> </div> |      |      |

<sup>a</sup> Annotation refinement (see Supplementary TABLE S3).

**FIG S3** Proteomic data and genomic predictions for mannitol degradation in *P. inhibens* DSM 17395. (A) Proposed degradation pathway. (B) False-colour 2D DIGE gel image comparing the proteome profile of mannitol-adapted cells to that of succinate-adapted cells. Identified proteins involved in the degradation and transport of mannitol are marked. (C) Protein ID, predicted function and fold change in abundance of marked proteins. Abbreviations of adaptation substrates: NAG, *N*-acetylglucosamine; MTL, mannitol; SUCR, sucrose; GLC, glucose; XYL, xylose.

### 3. Sucrose degradation (FIG S4)

**A**

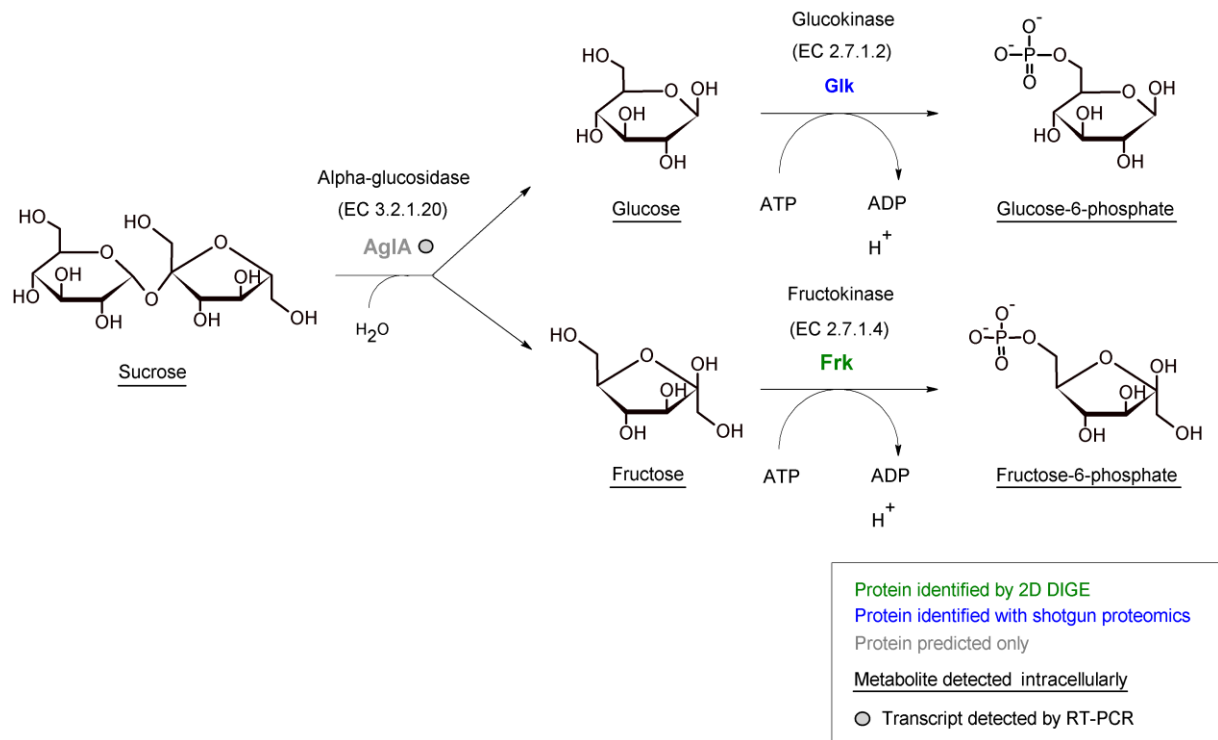

**B**

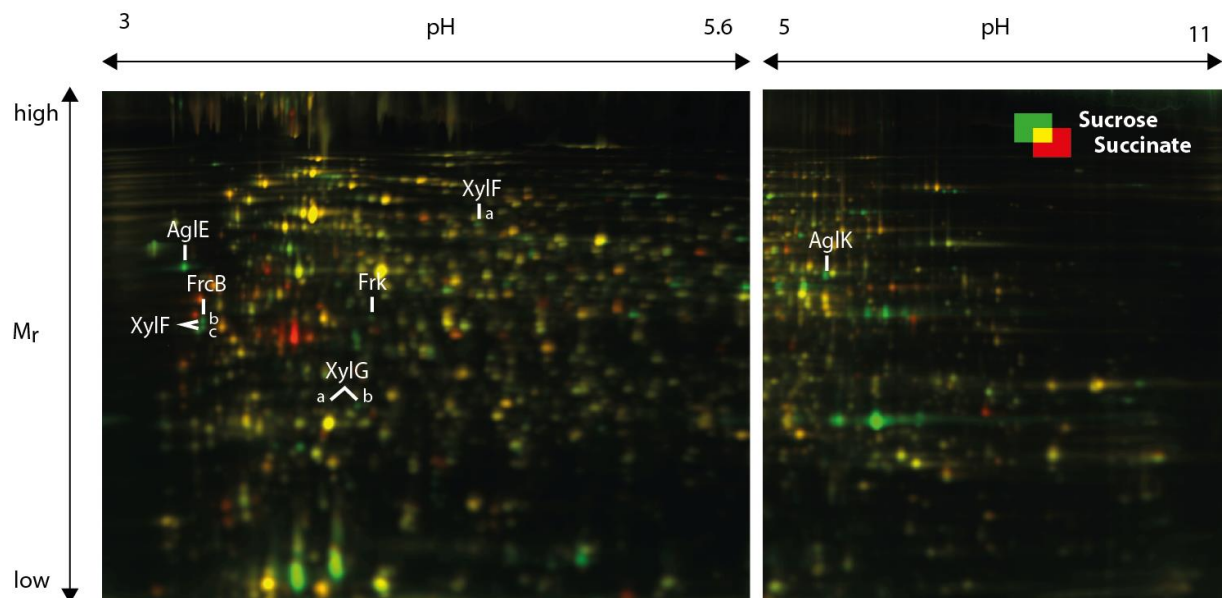

C

| Acc. No.<br>(PGA_)              | Name              | Predicted function                                                              | Spot | % of cumulative<br>spot volume of<br>single protein | Fold change in abundance as compared to<br>succinate-adapted cells (2D DIGE)                                                                                      |      |      |      |      |        |        |        |       |       |        |
|---------------------------------|-------------------|---------------------------------------------------------------------------------|------|-----------------------------------------------------|-------------------------------------------------------------------------------------------------------------------------------------------------------------------|------|------|------|------|--------|--------|--------|-------|-------|--------|
|                                 |                   |                                                                                 |      |                                                     | NAG                                                                                                                                                               | MTL  | SUCR | GLC  | XYL  |        |        |        |       |       |        |
| <b>CARBOHYDRATE METABOLISM</b>  |                   |                                                                                 |      |                                                     |                                                                                                                                                                   |      |      |      |      |        |        |        |       |       |        |
| <i>Sucrose</i>                  |                   |                                                                                 |      |                                                     |                                                                                                                                                                   |      |      |      |      |        |        |        |       |       |        |
| c28020                          | Frk               | Fructokinase                                                                    |      |                                                     | 1.6                                                                                                                                                               | 1.5  | 2.2  | -1.1 | 1.1  |        |        |        |       |       |        |
| <b>TRANSPORT</b>                |                   |                                                                                 |      |                                                     |                                                                                                                                                                   |      |      |      |      |        |        |        |       |       |        |
| <i>Sucrose</i>                  |                   |                                                                                 |      |                                                     |                                                                                                                                                                   |      |      |      |      |        |        |        |       |       |        |
| c07860                          | AglE              | Alpha-glucoside ABC transporter, periplasmic sugar-binding protein <sup>a</sup> |      |                                                     | 1.3                                                                                                                                                               | -2.7 | 29.1 | -1.0 | -1.6 |        |        |        |       |       |        |
| c07900                          | AglK              | Alpha-glucoside ABC transporter, ATP-binding protein <sup>a</sup>               |      |                                                     | 1.3                                                                                                                                                               | 1.7  | 6.8  | 1.7  | 1.7  |        |        |        |       |       |        |
| <i>Fructose</i>                 |                   |                                                                                 |      |                                                     |                                                                                                                                                                   |      |      |      |      |        |        |        |       |       |        |
| c28060                          | FrcB <sup>a</sup> | Fructose ABC transporter, periplasmic sugar-binding protein <sup>a</sup>        |      |                                                     | 1.8                                                                                                                                                               | 2.3  | 6.8  | 1.3  | 1.2  |        |        |        |       |       |        |
| <i>Xylose, glucose, sucrose</i> |                   |                                                                                 |      |                                                     |                                                                                                                                                                   |      |      |      |      |        |        |        |       |       |        |
| 262p00430                       | XylF              | Xylose ABC transporter, periplasmic sugar-binding protein <sup>a</sup>          | a    | 11.7                                                | 2.1                                                                                                                                                               | 2.0  | 6.4  | 1.9  | 2.8  |        |        |        |       |       |        |
| 262p00430                       | XylF              | Xylose ABC transporter, periplasmic sugar-binding protein <sup>a</sup>          | b    | 13.9                                                | 1.5                                                                                                                                                               | -1.1 | 3.7  | 4.7  | 7.4  |        |        |        |       |       |        |
| 262p00430                       | XylF              | Xylose ABC transporter, periplasmic sugar-binding protein <sup>a</sup>          | c    | 74.4                                                | 1.8                                                                                                                                                               | -3.8 | 3.2  | 7.3  | 11.8 |        |        |        |       |       |        |
| 262p00450                       | XylG <sup>a</sup> | Xylose ABC transporter, ATP-binding protein <sup>a</sup>                        | a    | 16.1                                                | -1.5                                                                                                                                                              | -3.0 | 4.9  | 20.8 | 21.6 |        |        |        |       |       |        |
| 262p00450                       | XylG <sup>a</sup> | Xylose ABC transporter, ATP-binding protein <sup>a</sup>                        | b    | 83.9                                                | -1.5                                                                                                                                                              | -1.2 | 1.6  | 3.5  | 3.4  |        |        |        |       |       |        |
|                                 |                   |                                                                                 |      |                                                     | <table border="1"> <tr> <td>&lt; -5.0</td> <td>&lt; -1.5</td> <td>&gt; -1.5</td> </tr> <tr> <td>&gt; 1.5</td> <td>&gt; 5.0</td> <td>&gt; 10.0</td> </tr> </table> |      |      |      |      | < -5.0 | < -1.5 | > -1.5 | > 1.5 | > 5.0 | > 10.0 |
| < -5.0                          | < -1.5            | > -1.5                                                                          |      |                                                     |                                                                                                                                                                   |      |      |      |      |        |        |        |       |       |        |
| > 1.5                           | > 5.0             | > 10.0                                                                          |      |                                                     |                                                                                                                                                                   |      |      |      |      |        |        |        |       |       |        |

<sup>a</sup> Annotation refinement (see Supplementary TABLE S3).



D

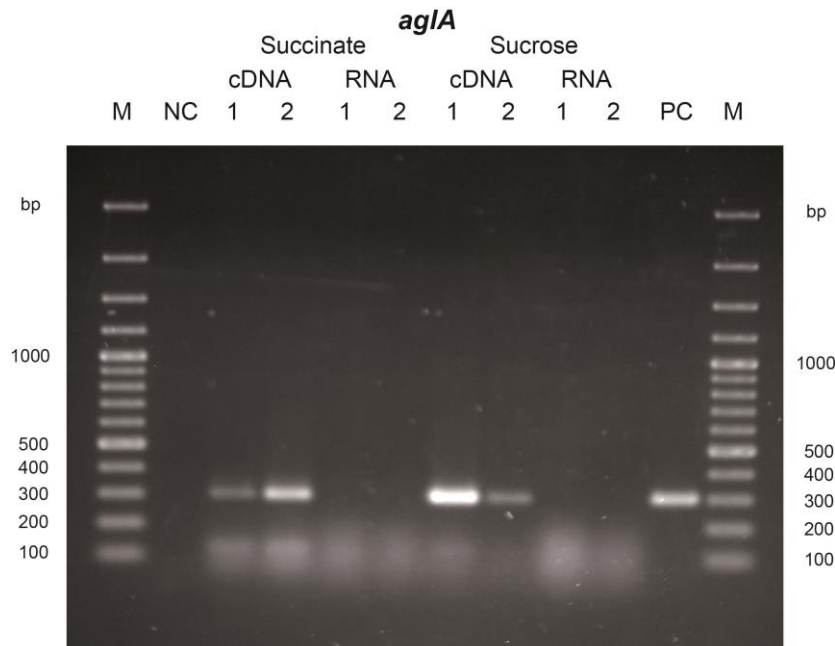

**FIG S4** Proteomic data, RT-PCR data and genomic predictions for sucrose degradation and transport in *P. inhibens* DSM 17395. (A) Proposed degradation pathway. (B) False-colour 2D DIGE gel image comparing the proteome profile of sucrose-adapted cells to that of succinate-adapted cells. Identified proteins involved in the degradation and transport of sucrose are marked. (C) Protein ID, predicted function and fold change in abundance of marked proteins. Abbreviations of adaptation substrates: NAG, *N*-acetylglucosamine; MTL, mannitol; SUCR, sucrose; GLC, glucose; XYL, xylose. (D) Expression of  $\alpha$ -glucosidase *aglA* (not captured by proteomics) analysed by RT-PCR. M, marker; NC, negative control; PC, positive control; 1, 2, biological replicates.

4. Glucose degradation (FIG S5)

A

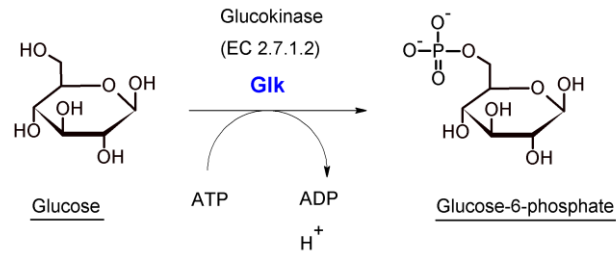

Protein identified with shotgun proteomics  
Metabolite detected intracellularly

B

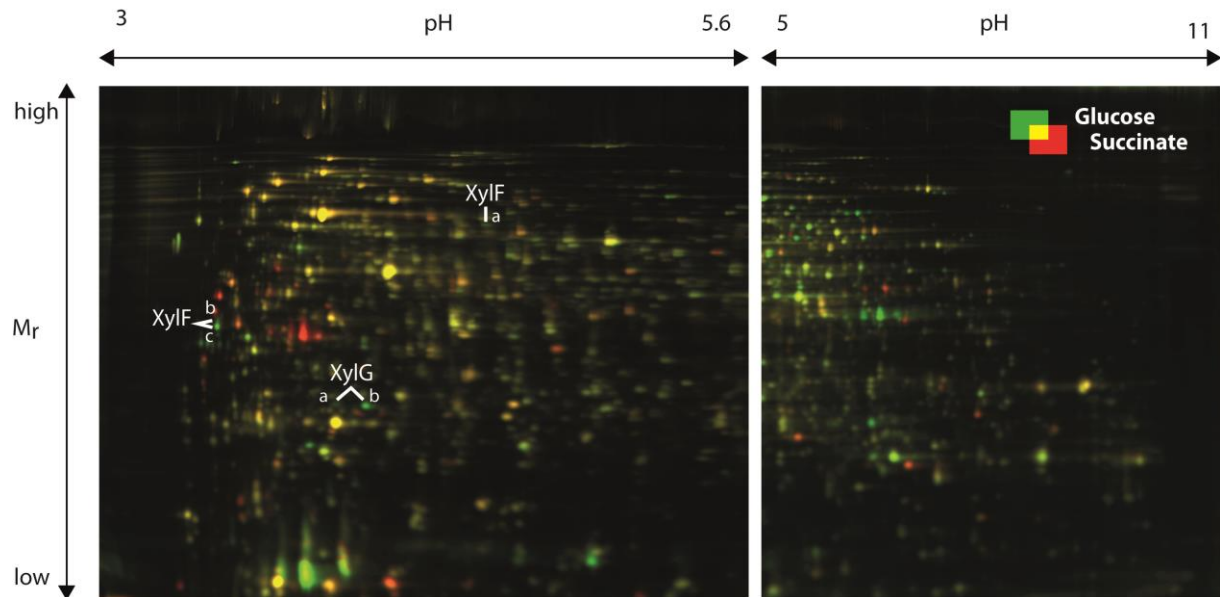

C

| Acc. No.<br>(PGA_)              | Name              | Predicted function                                                     | Spot | % of cumulative<br>spot volume of<br>single protein | Fold change in abundance as compared to<br>succinate-adapted cells (2D DIGE) |      |      |      |      |
|---------------------------------|-------------------|------------------------------------------------------------------------|------|-----------------------------------------------------|------------------------------------------------------------------------------|------|------|------|------|
|                                 |                   |                                                                        |      |                                                     | NAG                                                                          | MTL  | SUCR | GLC  | XYL  |
| <b>TRANSPORT</b>                |                   |                                                                        |      |                                                     |                                                                              |      |      |      |      |
| <i>Xylose, glucose, sucrose</i> |                   |                                                                        |      |                                                     |                                                                              |      |      |      |      |
| 262p00430                       | XylF              | Xylose ABC transporter, periplasmic sugar-binding protein <sup>a</sup> | a    | 11.7                                                | 2.1                                                                          | 2.0  | 6.4  | 1.9  | 2.8  |
| 262p00430                       | XylF              | Xylose ABC transporter, periplasmic sugar-binding protein <sup>a</sup> | b    | 13.9                                                | 1.5                                                                          | -1.1 | 3.7  | 4.7  | 7.4  |
| 262p00430                       | XylF              | Xylose ABC transporter, periplasmic sugar-binding protein <sup>a</sup> | c    | 74.4                                                | 1.8                                                                          | -3.8 | 3.2  | 7.3  | 11.8 |
| 262p00450                       | XylG <sup>a</sup> | Xylose ABC transporter, ATP-binding protein <sup>a</sup>               | a    | 16.1                                                | -1.5                                                                         | -3.0 | 4.9  | 20.8 | 21.6 |
| 262p00450                       | XylG <sup>a</sup> | Xylose ABC transporter, ATP-binding protein <sup>a</sup>               | b    | 83.9                                                | -1.5                                                                         | -1.2 | 1.6  | 3.5  | 3.4  |
|                                 |                   |                                                                        |      |                                                     | <b>Fold change</b> < -1.5    > -1.5    > 1.5    > 5.0    > 10.0              |      |      |      |      |

<sup>a</sup> Annotation refinement (see Supplementary TABLE S3).

**FIG S5** Proteomic data and genomic predictions for glucose degradation and transport in *P. inhibens* DSM 17395. (A) Proposed degradation pathway. (B) False-colour 2D DIGE gel image comparing the proteome profile of glucose-adapted cells to that of succinate-adapted cells. (C) Protein ID, predicted function and fold change in abundance of marked proteins. Abbreviations of adaptation substrates: NAG, *N*-acetylglucosamine; MTL, mannitol; SUCR, sucrose; GLC, glucose; XYL, xylose.

5. Xylose degradation (FIG S6)

A

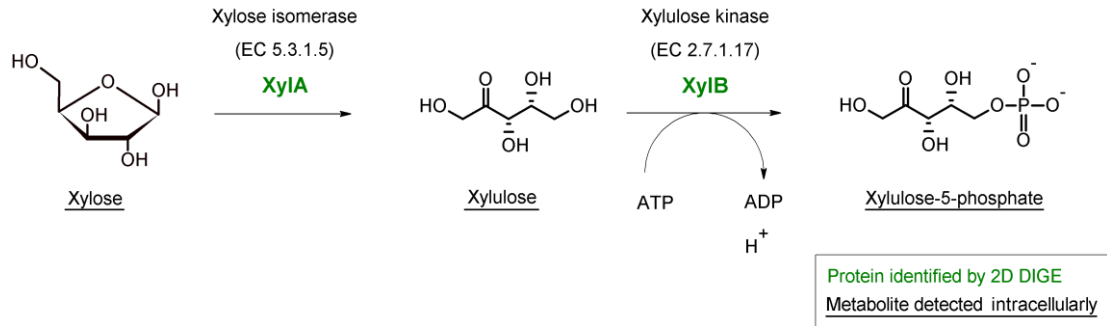

B

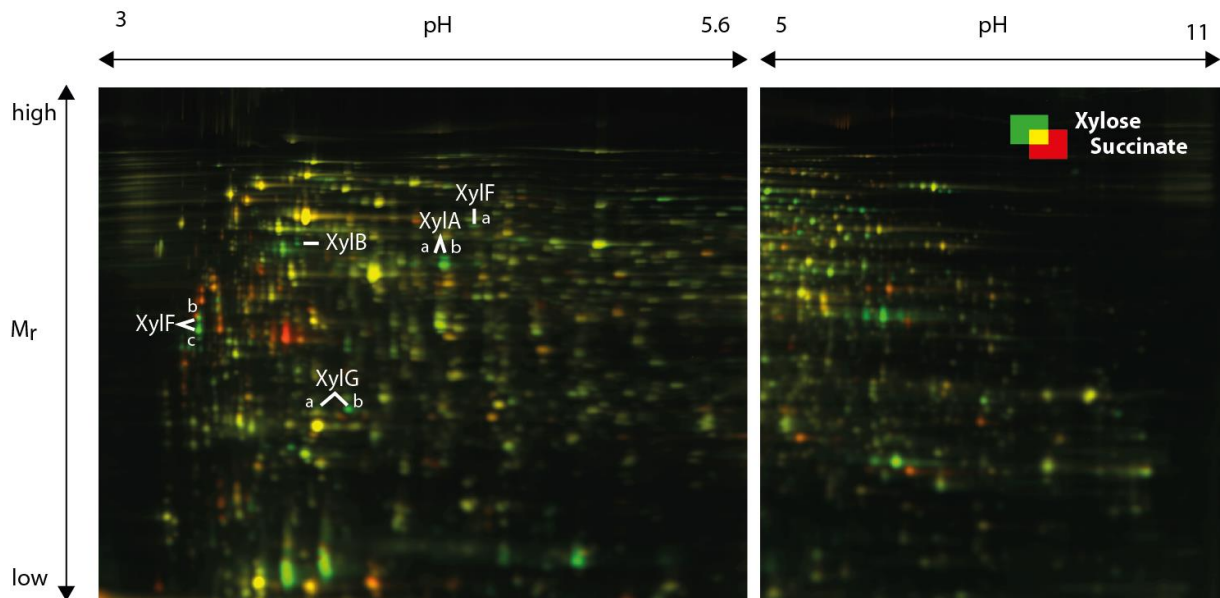

C

| Acc. No.<br>(PGA_)              | Name              | Predicted function                                                     | Spot | % of cumulative<br>spot volume of<br>single protein | Fold change in abundance as compared to<br>succinate-adapted cells (2D DIGE)                                                                                                                                                                                                                    |      |      |      |      |
|---------------------------------|-------------------|------------------------------------------------------------------------|------|-----------------------------------------------------|-------------------------------------------------------------------------------------------------------------------------------------------------------------------------------------------------------------------------------------------------------------------------------------------------|------|------|------|------|
|                                 |                   |                                                                        |      |                                                     | NAG                                                                                                                                                                                                                                                                                             | MTL  | SUCR | GLC  | XYL  |
| <b>CARBOHYDRATE METABOLISM</b>  |                   |                                                                        |      |                                                     |                                                                                                                                                                                                                                                                                                 |      |      |      |      |
| <i>Xylose</i>                   |                   |                                                                        |      |                                                     |                                                                                                                                                                                                                                                                                                 |      |      |      |      |
| c14000                          | XylA              | Xylose isomerase                                                       | b    | 75.3                                                | 1.0                                                                                                                                                                                                                                                                                             | -1.2 | 1.0  | -1.2 | 5.0  |
| c14000                          | XylA              | Xylose isomerase                                                       | a    | 24.7                                                | 1.5                                                                                                                                                                                                                                                                                             | 1.4  | 1.4  | 1.4  | 1.8  |
| c14010                          | XylB              | Xylulose kinase                                                        |      |                                                     | -1.4                                                                                                                                                                                                                                                                                            | 1.4  | 1.3  | 1.9  | 17.2 |
| <b>TRANSPORT</b>                |                   |                                                                        |      |                                                     |                                                                                                                                                                                                                                                                                                 |      |      |      |      |
| <i>Xylose, glucose, sucrose</i> |                   |                                                                        |      |                                                     |                                                                                                                                                                                                                                                                                                 |      |      |      |      |
| 262p00430                       | XylF              | Xylose ABC transporter, periplasmic sugar-binding protein <sup>a</sup> | a    | 11.7                                                | 2.1                                                                                                                                                                                                                                                                                             | 2.0  | 6.4  | 1.9  | 2.8  |
| 262p00430                       | XylF              | Xylose ABC transporter, periplasmic sugar-binding protein <sup>a</sup> | b    | 13.9                                                | 1.5                                                                                                                                                                                                                                                                                             | -1.1 | 3.7  | 4.7  | 7.4  |
| 262p00430                       | XylF              | Xylose ABC transporter, periplasmic sugar-binding protein <sup>a</sup> | c    | 74.4                                                | 1.8                                                                                                                                                                                                                                                                                             | -3.8 | 3.2  | 7.3  | 11.8 |
| 262p00450                       | XylG <sup>a</sup> | Xylose ABC transporter, ATP-binding protein <sup>a</sup>               | a    | 16.1                                                | -1.5                                                                                                                                                                                                                                                                                            | -3.0 | 4.9  | 20.8 | 21.6 |
| 262p00450                       | XylG <sup>a</sup> | Xylose ABC transporter, ATP-binding protein <sup>a</sup>               | b    | 83.9                                                | -1.5                                                                                                                                                                                                                                                                                            | -1.2 | 1.6  | 3.5  | 3.4  |
|                                 |                   |                                                                        |      |                                                     | <b>Fold change</b>                                                                                                                                                                                                                                                                              |      |      |      |      |
|                                 |                   |                                                                        |      |                                                     | <span style="background-color: #ffffcc;">&lt; -1.5</span> <span style="background-color: #ffcc99;">&gt; -1.5</span> <span style="background-color: #ccffcc;">&gt; 1.5</span> <span style="background-color: #99ff99;">&gt; 5.0</span> <span style="background-color: #66ff66;">&gt; 10.0</span> |      |      |      |      |

<sup>a</sup> Annotation refinement (see Supplementary TABLE S3).

**FIG S6** Proteomic data and genomic predictions for xylose degradation and transport in *P. inhibens* DSM 17395. (A) Proposed degradation pathway. (B) False-colour 2D DIGE gel image comparing the proteome profile of xylose-adapted cells to that of succinate-adapted cells. Identified proteins involved in the degradation and transport of xylose are marked. (C) Protein ID, predicted function, fold change in abundance of marked proteins and percentage share of each protein spot from the cumulative spot volume of a single protein. Abbreviations of adaptation substrates: NAG, *N*-acetylglucosamine; MTL, mannitol; SUCR, sucrose; GLC, glucose; XYL, xylose.

## Intra- and extracellular metabolites of *P. inhibens* DSM 17395 identified in this study (TABLES S5 & S6)

**TABLE S5** Intracellular metabolites of *P. inhibens* DSM 17395 identified in this study. Abbreviations of adaptation substrates: NAG, *N*-acetylglucosamine; MTL, mannitol; SUCR, sucrose; GLC, glucose; XYL, xylose.

| Metabolites                                  | Fold change <sup>a</sup> |       |       |       |        |
|----------------------------------------------|--------------------------|-------|-------|-------|--------|
|                                              | NAG                      | MTL   | SUCR  | GLC   | XYL    |
| <b>Sugars and derivatives</b>                |                          |       |       |       |        |
| <u>Hexoses</u>                               |                          |       |       |       |        |
| 1,6-Anhydro-glucose                          | 1.46                     | 1.71  | 0.84  | 1.07  | 1.23   |
| 6-Deoxy-mannose                              | 13.04                    | 15.60 | 4.07  | 4.64  | 14.99  |
| Fructose                                     | 0.73                     | 8.27  | 17.29 | 2.21  | 1.05   |
| Fructose-6-phosphate                         | 0.07                     | 0.02  | 4.28  | 4.30  | 0.44   |
| Glucose                                      | 1.59                     | 2.00  | 0.78  | 1.04  | 0.86   |
| Glucose/Galactose/Mannose-6-phosphate        | 0.03                     | 0.04  | 0.16  | 0.30  | 0.14   |
| Glucose/Glucosamine/Sorbitol-6-phosphate     | 0.03                     | 0.12  | 0.66  | 47.27 | 0.33   |
| Gluconate-1,4-lactone                        | 0.91                     | 1.97  | 1.44  | 0.81  | 1.13   |
| Glucoheptonate-1,4-lactone                   | 1.53                     | 0.70  | 0.69  | 0.56  | 2.18   |
| Glucosamine                                  | 0.49                     |       | 0.12  |       | 0.12   |
| Glucosaminat                                 | ##                       | #     | #     | #     | #      |
| <i>N</i> -Acetylglucosamine                  | 12.02                    | 1.33  | 1.69  | 2.65  | 1.36   |
| <i>N</i> -Acetylmannosamine                  | #                        |       | #     | #     |        |
| Glucuronate                                  |                          |       | 3.35  | 87.00 |        |
| Mannitol                                     | 0.76                     | 19.86 | 1.02  | 0.47  | 0.43   |
| <u>Pentoses / Pentose phosphate pathway</u>  |                          |       |       |       |        |
| Arabinonate                                  | 9.34                     | 11.24 | 4.25  | 21.62 | 109.52 |
| Erythrose-4-phosphate                        | 3.74                     | 2.75  | 5.45  | 0.48  | 0.99   |
| Ribonate                                     | 5.71                     | 13.57 | 5.49  | 8.90  | 69.55  |
| Ribose                                       | 1.02                     | 2.30  | 0.81  | 0.89  | 2.45   |
| Xylose                                       |                          |       | #     |       | ##     |
| Xylulose                                     | 0.81                     | 0.76  | 0.52  | 0.87  | 0.87   |
| Xylulose-/ Ribulose-5-phosphate              | 0.09                     |       | 0.05  | 0.17  | 1.00   |
| <u>Di-Saccharides</u>                        |                          |       |       |       |        |
| Melibiose                                    | #                        | #     | #     | #     | #      |
| Sucrose                                      |                          |       | #     |       |        |
| Alpha-D-Glucopyranosyl-(1,6)-mannitol        |                          | #     |       |       |        |
| Alpha-D-Mannopyranosyl-(1,2)-D-mannopyranose |                          | ##    | #     |       |        |
| <u>Entner-Doudoroff pathway</u>              |                          |       |       |       |        |
| Glucono-1,5-lactone *                        | 4.70                     | 8.99  | 9.83  | 22.36 | 4.99   |
| Galactonate / Gluconate *                    | 11.38                    | 4.62  | 8.06  | 25.95 | 6.58   |
| 6-Phosphogluconate                           | 0.24                     | 0.96  | 5.05  | 15.77 | 0.17   |
| 2-Keto-3-deoxy-D-gluconate (KDG) *           | 30.50                    | 4.66  | 1.87  | 3.18  | 2.05   |
| Glyceraldehyde *                             | 1.05                     | 0.75  | 0.50  | 0.64  | 0.76   |
| Dihydroxyacetonephosphate                    | 1.68                     | 0.31  | 0.39  | 0.63  | 0.60   |
| 1,3-Dihydroxyacetone *                       | 0.77                     | 0.95  | 1.00  | 1.12  | 0.98   |
| 3-Phosphoglycerate                           | 3.77                     | 1.58  | 1.66  | 8.75  | 2.60   |
| 2-Phosphoglycerate                           | 1.64                     | 0.42  | 0.80  | 2.70  |        |
| Phosphoenolpyruvate                          | 1.95                     | 1.77  | 1.27  | 4.43  | 1.84   |
| Pyruvate                                     | 7.71                     | 3.62  | 3.11  | 3.84  | 5.35   |
| <u>TCA cycle</u>                             |                          |       |       |       |        |
| Citrate                                      | 4.00                     | 1.28  | 0.89  | 5.06  | 4.39   |
| 2-Oxoglutarate                               | 1.90                     | 0.73  | 0.60  | 1.10  | 1.31   |
| Succinate                                    | 0.60                     | 0.30  | 0.07  | 0.13  | 0.24   |
| Fumarate                                     | 2.11                     | 0.71  | 0.35  | 0.37  | 0.52   |
| Malate                                       | 3.45                     | 0.48  | 0.28  | 0.34  | 0.40   |

TABLE S5 continued

| Metabolites                        | Fold change <sup>a</sup> |       |       |        |       |
|------------------------------------|--------------------------|-------|-------|--------|-------|
|                                    | NAG                      | MTL   | SUCR  | GLC    | XYL   |
| <b>Amino acids and derivatives</b> |                          |       |       |        |       |
| Alanine                            | 4.21                     | 0.47  | 0.05  | 0.16   | 0.27  |
| Aspartate                          | 0.13                     | 0.08  | 0.05  | 0.06   | 0.03  |
| Beta-Alanine                       | 0.55                     | 0.44  | 0.24  | 0.28   | 0.42  |
| Glutamate                          | 0.89                     | 0.75  | 0.43  | 0.70   | 0.66  |
| Glutamine                          | 1.12                     | 1.48  | 1.41  | 1.33   | 1.09  |
| Glycine                            | 0.76                     | 0.36  | 0.20  | 0.18   | 0.23  |
| Homoserine                         | 1.16                     | 1.39  | 1.23  | 1.21   | 3.02  |
| Isoleucine                         | 1.20                     | 1.27  | 0.16  | 0.77   | 0.58  |
| Leucine                            | 1.05                     | 1.43  | 0.24  | 0.74   | 0.56  |
| Lysine                             | 0.19                     | 0.42  | 0.08  | 0.21   | 0.17  |
| Methionine                         | 2.53                     | 0.31  | 0.12  | 0.26   | 0.47  |
| <i>N,N</i> -Dimethylglycine        | 1.02                     | 0.73  | 1.38  | 2.23   | 1.29  |
| <i>N</i> -Acetylglutamate          | 6.77                     | 0.78  |       | 0.87   | 1.08  |
| <i>O</i> -Acetylserine             | 18.63                    | 11.83 | 0.91  | 3.08   | 11.50 |
| Ornithine                          | 1.46                     | 0.41  | 0.22  | 0.38   | 1.04  |
| Phenylalanine                      | 0.91                     | 0.35  | 0.13  | 0.24   | 0.37  |
| Proline                            | 0.57                     | 0.39  | 0.06  | 0.13   | 0.27  |
| Pyroglutamate                      | 0.64                     | 0.91  | 0.55  | 0.70   | 0.70  |
| Serine                             | 1.15                     | 0.41  | 0.25  | 0.33   | 0.42  |
| Threonine                          | 1.17                     | 1.01  | 0.31  | 0.42   | 0.74  |
| Tyrosine                           | 0.93                     | 0.72  | 0.17  | 0.43   | 0.48  |
| Valine                             | 1.99                     | 1.64  | 0.54  | 0.62   | 0.66  |
| <b>Polyamines and dipeptides</b>   |                          |       |       |        |       |
| Cadaverine                         | 0.93                     | 1.17  | 0.73  | 1.36   | 1.06  |
| Glycylglycine                      | 0.92                     | 0.46  | 0.06  | 0.18   | 0.71  |
| Putrescine                         | 0.99                     | 0.52  | 0.12  | 0.13   | 0.53  |
| <b>Organic acids</b>               |                          |       |       |        |       |
| 2-Aminoadipate                     | 0.36                     | 1.36  | 0.08  | 0.29   | 0.71  |
| Benzoate                           | 1.35                     | 1.74  | 1.45  | 1.76   | 1.91  |
| Erythronate                        | 8.23                     | 2.70  | 1.61  | 2.90   | 1.91  |
| Glycerate                          | 0.99                     | 1.98  | 1.86  | 2.21   | 1.34  |
| Glyoxylate                         | 1.72                     | 1.31  | 2.20  | 5.33   | 3.03  |
| 2-Hydroxyglutarate                 | 2.03                     | 0.44  | 0.29  | 0.19   | 0.63  |
| Iminodiacetate                     | 31.08                    | 1.90  | 0.77  | 5.64   | 2.13  |
| Lactate                            | 1.30                     | 0.33  | 0.51  | 0.42   | 0.30  |
| Maleate                            | 2.53                     | 0.64  | 0.42  | 0.69   | 0.52  |
| Malonate                           | #                        | #     | #     | #      | #     |
| 2-Methyl-malate                    | 4.02                     | 2.59  | 2.29  | 4.20   | 2.88  |
| 2-Methyl-serine                    | 1.83                     | 2.81  | 3.29  | 1.27   | 0.91  |
| Nicotinamide                       | 0.91                     | 1.03  | 0.72  | 0.86   | 0.85  |
| Nicotinate                         | 0.39                     | 0.71  | 0.58  | 0.66   | 0.42  |
| Phenylacetate                      | 0.39                     | 0.79  | 0.88  | 0.81   | 0.59  |
| Succinate-methylester              | 0.96                     | 1.34  | 1.04  | 1.29   | 1.05  |
| Tartrate                           | 0.68                     | 1.59  | 10.82 | 168.67 | 3.06  |
| Threonate                          | 2.59                     | 4.20  | 29.65 | 13.08  | 2.64  |
| Urea                               | 0.98                     | 0.80  | 0.26  | 0.69   | 0.27  |
| <b>Butanoates</b>                  |                          |       |       |        |       |
| 2-Aminobutanoate                   | 0.42                     | 0.16  | 0.12  | 0.19   | 0.19  |
| 4-Aminobutanoate                   | 0.81                     | 0.55  | 0.21  | 0.19   | 0.46  |
| 3-Aminoisobutanoate                | 3.03                     | 0.29  | 0.09  | 0.20   | 0.50  |
| 2-Hydroxybutanoate                 | 0.82                     | 1.25  | 1.16  | 1.29   | 1.06  |
| 3-Hydroxybutanoate                 | 0.19                     | 0.29  | 0.34  | 0.29   | 0.18  |
| 4-Oxobutanoate                     | 0.80                     | 0.51  | 0.36  | 0.48   | 0.59  |

TABLE S5 continued

| Metabolites                                        | Fold change <sup>a</sup>                                                                    |       |       |            |       |
|----------------------------------------------------|---------------------------------------------------------------------------------------------|-------|-------|------------|-------|
|                                                    | NAG                                                                                         | MTL   | SUCR  | GLC        | XYL   |
| <b>Lipid and phospholipid headgroup components</b> |                                                                                             |       |       |            |       |
| Ethanolamine                                       | 0.41                                                                                        | 0.23  | 0.12  | 0.19       | 0.18  |
| Ethanolaminephosphate                              | 1.01                                                                                        | 0.09  | 0.23  | 0.36       | 0.36  |
| Diethanolamine                                     | 6.30                                                                                        | 8.24  | 2.19  | 5.14       | 7.85  |
| Glycerol-3-phosphate                               | 0.18                                                                                        | 0.11  | 0.05  | 0.12       | 0.07  |
| Glycerophosphoglycerol                             | 0.05                                                                                        | 0.03  | 0.09  | 0.89       | 0.07  |
| Octanoate                                          | 0.67                                                                                        | 0.29  | 0.27  | 0.31       | 0.25  |
| 3-Hydroxydecanoate                                 | 0.57                                                                                        | 0.60  | 0.67  | 0.63       | 0.52  |
| Dodecanoate                                        | 0.59                                                                                        | 1.13  | 1.52  | 1.52       | 0.95  |
| Dodecanol                                          | 0.44                                                                                        | 13.58 | 11.49 | 5.63       | 4.75  |
| Tetradecanoate                                     | 0.36                                                                                        | 0.44  | 0.25  | 0.28       | 0.41  |
| Tetradecanol                                       | 0.79                                                                                        | 1.84  | 1.69  | 1.61       | 1.28  |
| Hexadecanoate                                      | 0.71                                                                                        | 1.02  | 0.83  | 0.96       | 1.12  |
| Octadecanoate                                      | 0.51                                                                                        | 1.11  | 1.11  | 0.80       | 0.93  |
| Octadecenoate                                      | 0.29                                                                                        | 0.22  | 0.80  | 0.47       | 0.20  |
| <b>Nucleosides and nucleobases</b>                 |                                                                                             |       |       |            |       |
| Cytosine                                           | 0.35                                                                                        | 0.30  | 0.06  | 0.05       | 0.33  |
| Thymine                                            | 1.20                                                                                        | 0.94  | 0.16  | 0.22       | 0.99  |
| Uracil                                             | 0.66                                                                                        | 0.74  | 0.66  | 0.31       | 0.55  |
| Uridine                                            | 0.28                                                                                        | 2.11  | 1.03  | 0.27       | 18.28 |
| <b>Others</b>                                      |                                                                                             |       |       |            |       |
| Borate                                             | 0.67                                                                                        | 0.54  | 2.18  | 7.71       | 1.75  |
| Carbodiimide                                       | 0.69                                                                                        | 1.20  | 0.85  | 0.84       | 0.90  |
| Hydrogen sulfide                                   | 0.78                                                                                        | 0.82  | 0.80  | 0.51       | 0.84  |
| Phosphate                                          | 0.79                                                                                        | 0.88  | 0.67  | 0.69       | 0.81  |
| Phosphate monomethyl ester                         | 0.88                                                                                        | 1.29  | 1.36  | 1.34       | 1.11  |
| Toluate                                            | 0.94                                                                                        | 1.41  | 1.30  | 1.41       | 1.42  |
| <b>n.d</b>                                         |                                                                                             |       |       |            |       |
|                                                    |                                                                                             |       |       | < 0.1      |       |
|                                                    |                                                                                             |       |       | < 0.34     |       |
|                                                    |                                                                                             |       |       | < 0.66     |       |
|                                                    |                                                                                             |       |       | 0.67 - 1.5 |       |
|                                                    |                                                                                             |       |       | > 1.5      |       |
|                                                    |                                                                                             |       |       | > 2.5      |       |
|                                                    |                                                                                             |       |       | > 5.0      |       |
|                                                    |                                                                                             |       |       | > 10.0     |       |
| #                                                  | compound not detected in reference                                                          |       |       |            |       |
| ##                                                 | compound not detected in reference, but intense peak in corresponding cultivation condition |       |       |            |       |
| *                                                  | probably dephosphorylated during extraction                                                 |       |       |            |       |

<sup>a</sup>, Fold change in metabolite abundance as compared to reference condition (succinate as sole carbon source)





## Comparative genome analysis to study the relevance of the studied carbohydrate degradation pathways within *Rhodobacterales* and other heterotrophic bacteria (TABLE S7, FIG S7)

**TABLE S7** Genes of *P. inhibens* DSM 17395 used for comparative genomics are compiled together with their locus tags, EC numbers and corresponding enzyme names.

| Gene name                                    | Accession No.  | Predicted function                                                             | EC number |
|----------------------------------------------|----------------|--------------------------------------------------------------------------------|-----------|
| <b>CARBOHYDRATE TRANSPORT AND METABOLISM</b> |                |                                                                                |           |
| <b><i>N-Acetylglucosamine</i></b>            |                |                                                                                |           |
| <i>acs</i>                                   | PGA1_c12950    | Acetyl-coenzyme A synthetase                                                   | 6.2.1.1   |
| <i>nagA</i>                                  | PGA1_c27880    | <i>N</i> -Acetylglucosamine-6-phosphate deacetylase                            | 3.5.1.25  |
| <i>nagB</i>                                  | PGA1_c27890    | Glucosamine-6-phosphate deaminase                                              | 3.5.99.6  |
|                                              | PGA1_c27900    | GntR family transcriptional regulator                                          |           |
| <i>nagK</i>                                  | PGA1_c27910    | <i>N</i> -Acetylglucosamine kinase                                             | 2.7.1.59  |
| <i>murQ</i>                                  | PGA1_c27920    | <i>N</i> -Acetylmuramic acid 6-phosphate etherase                              | 4.2.1.126 |
|                                              | PGA1_c27930    | <i>N</i> -Acetylglucosamine ABC transporter, periplasmic sugar-binding protein |           |
|                                              | PGA1_c27940    | <i>N</i> -Acetylglucosamine ABC transporter, permease                          |           |
|                                              | PGA1_c27950    | <i>N</i> -Acetylglucosamine ABC transporter, permease                          |           |
|                                              | PGA1_c27970    | <i>N</i> -Acetylglucosamine ABC transporter, ATP-binding protein               |           |
| <b><i>Mannitol</i></b>                       |                |                                                                                |           |
| <i>mtlK</i>                                  | PGA1_c13160    | Mannitol 2-dehydrogenase                                                       | 1.1.1.67  |
| <i>polS</i>                                  | PGA1_c13170    | Sorbitol dehydrogenase                                                         | 1.1.1.14  |
| <i>snoK</i>                                  | PGA1_c13180    | Mannitol ABC transporter, ATP-binding transport protein                        |           |
|                                              | PGA1_c13190    | Mannitol ABC transporter, permease                                             |           |
|                                              | PGA1_c13200    | Mannitol ABC transporter, permease                                             |           |
|                                              | PGA1_c13210    | Mannitol ABC transporter, periplasmic sugar-binding protein                    |           |
|                                              | PGA1_c13220    | Putative transcriptional regulator, lacl family                                |           |
| <b><i>Sucrose</i></b>                        |                |                                                                                |           |
| <i>aglR</i>                                  | PGA1_c07850    | Transcriptional regulator, lacl family                                         |           |
| <i>aglE</i>                                  | PGA1_c07860    | Alpha-glucosides ABC transporter, periplasmic sugar-binding protein            |           |
| <i>aglF</i>                                  | PGA1_c07870    | Alpha-glucoside ABC transporter, permease                                      |           |
| <i>aglG</i>                                  | PGA1_c07880    | Alpha-glucoside ABC transporter, permease                                      |           |
| <i>aglA</i>                                  | PGA1_c07890    | Alpha-glucosidase                                                              | 3.2.1.20  |
| <i>aglK</i>                                  | PGA1_c07900    | Alpha-glucoside transport ATP-binding protein                                  |           |
| <b><i>Fructose</i></b>                       |                |                                                                                |           |
| <i>frk</i>                                   | PGA1_c28020    | Fructokinase                                                                   | 2.7.1.4   |
| <i>frcK</i>                                  | PGA1_c28030    | Fructose ABC transporter, kinase                                               |           |
| <i>frcA</i>                                  | PGA1_c28040    | Fructose ABC transporter, ATP-binding protein                                  |           |
| <i>frcC</i>                                  | PGA1_c28050    | Fructose ABC transporter, permease                                             |           |
| <i>frcB</i>                                  | PGA1_c28060    | Fructose ABC transporter, periplasmic sugar-binding protein                    |           |
| <i>frcR</i>                                  | PGA1_c28070    | MarR family transcriptional regulator                                          |           |
| <b><i>Xylose, glucose, sucrose</i></b>       |                |                                                                                |           |
| <i>xylF</i>                                  | PGA1_262p00430 | Xylose ABC transporter, periplasmic sugar-binding protein                      |           |
| <i>xylH</i>                                  | PGA1_262p00440 | Xylose ABC transporter, permease                                               |           |
| <i>xylG</i>                                  | PGA1_262p00450 | Xylose ABC transporter, ATP-binding protein                                    |           |
|                                              | PGA1_262p00460 | Transcriptional regulator, MerR family                                         |           |
| <b><i>Glucose, sucrose</i></b>               |                |                                                                                |           |
| <i>glk</i>                                   | PGA1_c05420    | Glucokinase                                                                    | 2.7.1.2   |
| <b><i>Xylose</i></b>                         |                |                                                                                |           |
|                                              | PGA1_c13990    | Putative transcriptional regulator, lacl family                                |           |
| <i>xylA</i>                                  | PGA1_c14000    | Xylose isomerase                                                               | 5.3.1.5   |
| <i>xylB</i>                                  | PGA1_c14010    | Xylose kinase                                                                  | 2.7.1.17  |

| Gene name                                                                                | Accession No. | Predicted function                                                  | EC number          |
|------------------------------------------------------------------------------------------|---------------|---------------------------------------------------------------------|--------------------|
| <b>CENTRAL METABOLISM</b>                                                                |               |                                                                     |                    |
| <i>Entner-Doudoroff pathway</i>                                                          |               |                                                                     |                    |
| <i>pgl</i>                                                                               | PGA1_c15170   | 6-Phosphogluconolactonase                                           | 3.1.1.31           |
| <i>pgi</i>                                                                               | PGA1_c27980   | Glucose-6-phosphate isomerase                                       | 5.3.1.9            |
| <i>zwf2</i>                                                                              | PGA1_c27990   | Glucose-6-phosphate 1-dehydrogenase                                 | 1.1.1.49           |
| <i>edd</i>                                                                               | PGA1_c28000   | Phosphogluconate dehydratase                                        | 4.2.1.12           |
| <i>eda</i>                                                                               | PGA1_c28010   | KHG/KDPG aldolase                                                   | 4.1.3.16/ 4.1.2.14 |
| <i>Lower branch of Embden-Meyerhof Parnas pathway and pyruvate dehydrogenase complex</i> |               |                                                                     |                    |
| <i>gpmI</i>                                                                              | PGA1_c02770   | 2,3-Bisphosphoglycerate-independent phosphoglycerate mutase         | 5.4.2.1            |
| <i>pykA</i>                                                                              | PGA1_c06970   | Pyruvate kinase                                                     | 2.7.1.40           |
| <i>eno</i>                                                                               | PGA1_c11420   | Enolase                                                             | 4.2.1.11           |
| <i>lpdA1</i>                                                                             | PGA1_c17390   | Dihydrolipoyl dehydrogenase                                         | 1.8.1.4            |
| <i>pgk</i>                                                                               | PGA1_c17530   | Phosphoglycerate kinase                                             | 2.7.2.3            |
|                                                                                          | PGA1_c17540   | Septum formation initiator-like protein                             |                    |
| <i>pdhA</i>                                                                              | PGA1_c17550   | Pyruvate dehydrogenase, E1 alpha subunit                            | 1.2.4.1            |
| <i>pdhB</i>                                                                              | PGA1_c17560   | Pyruvate dehydrogenase, E1 beta subunit                             | 1.2.4.1            |
| <i>pdhC</i>                                                                              | PGA1_c17570   | Pyruvate dehydrogenase, E2                                          | 2.3.1.12           |
| <i>gap</i>                                                                               | PGA1_c27490   | Glyceraldehyde-3-phosphate dehydrogenase                            | 1.2.1.12           |
| <i>Pentose phosphate pathway</i>                                                         |               |                                                                     |                    |
| <i>rpe</i>                                                                               | PGA1_c04170   | Ribulose-phosphate 3-epimerase                                      | 5.1.3.1            |
| <i>tal</i>                                                                               | PGA1_c05780   | Transaldolase                                                       | 2.2.1.2            |
| <i>rpiB</i>                                                                              | PGA1_c10730   | Ribose-5-phosphate isomerase B                                      | 5.3.1.6            |
| <i>tktA</i>                                                                              | PGA1_c17230   | Transketolase                                                       | 2.2.1.1            |
| <i>rpiA</i>                                                                              | PGA1_c23740   | Ribose-5-phosphate isomerase A                                      | 5.3.1.6            |
| <i>TCA cycle</i>                                                                         |               |                                                                     |                    |
| <i>lpd2</i>                                                                              | PGA1_c03550   | Dihydrolipoyl dehydrogenase                                         | 1.8.1.4            |
| <i>sucB</i>                                                                              | PGA1_c03590   | 2-Oxoglutarate dehydrogenase complex, E2                            | 2.3.1.61           |
| <i>sucA</i>                                                                              | PGA1_c03600   | 2-Oxoglutarate dehydrogenase, E1                                    | 1.2.4.2            |
| <i>sucD</i>                                                                              | PGA1_c03610   | Succinyl-CoA ligase [ADP-forming], subunit alpha                    | 6.2.1.5            |
|                                                                                          | PGA1_c03620   | Hypothetical protein                                                |                    |
| <i>sucC</i>                                                                              | PGA1_c03630   | Succinyl-CoA ligase [ADP-forming], subunit beta                     | 6.2.1.5            |
| <i>mdh</i>                                                                               | PGA1_c03650   | Malate dehydrogenase                                                | 1.1.1.37           |
| <i>sdhC</i>                                                                              | PGA1_c03740   | Succinate dehydrogenase, cytochrome <i>b</i> <sub>556</sub> subunit | 1.3.99.1           |
| <i>sdhD</i>                                                                              | PGA1_c03750   | Succinate dehydrogenase, hydrophobic membrane anchor subunit        | 1.3.99.1           |
| <i>sdhA</i>                                                                              | PGA1_c03760   | Succinate dehydrogenase, flavoprotein subunit                       | 1.3.99.1           |
|                                                                                          | PGA1_c03770   | Hypothetical protein                                                |                    |
| <i>sdhB</i>                                                                              | PGA1_c03780   | Succinate dehydrogenase, iron-sulfur subunit                        | 1.3.99.1           |
| <i>fumC</i>                                                                              | PGA1_c13520   | Fumarate hydratase class II                                         | 4.2.1.2            |
| <i>gltaI</i>                                                                             | PGA1_c16970   | Citrate synthase                                                    | 2.3.3.1            |
| <i>acnA</i>                                                                              | PGA1_c18830   | Aconitate hydratase                                                 | 4.2.1.3            |
| <i>icd</i>                                                                               | PGA1_c28340   | Isocitrate dehydrogenase [NADP]                                     | 1.1.1.42           |

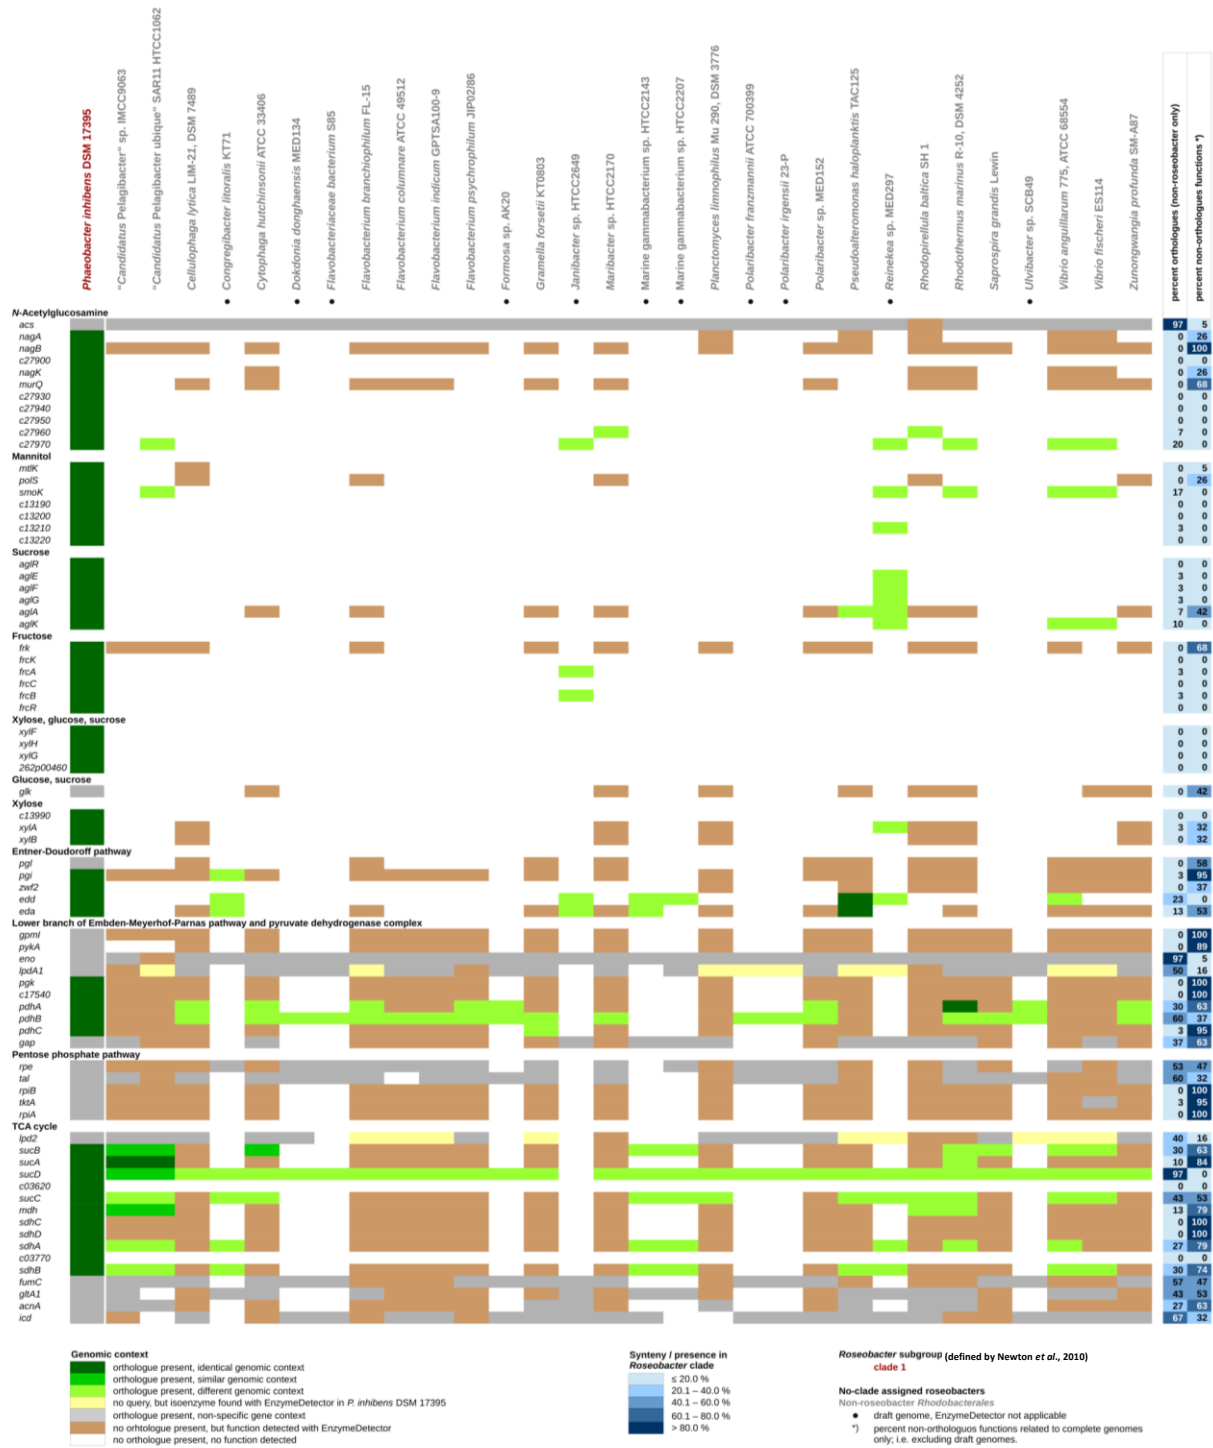

**FIG S7** Genome comparison of 30 selected heterotrophic bacteria. Shown are genes of *P. inhibens* DSM 17395 related to the investigated carbohydrate transport, degradation and regulation, as well as central metabolism (gene names as shown in Table S7) with their respective orthologues in the other species. Where applicable, the genomic context of the involved genes was investigated, leading to a categorization, with *P. inhibens* DSM 17395 set as reference (see Material and Methods).

**SDS-PAGE gels of outer and cytoplasmic membrane protein-enriched and soluble fractions (FIG S8)**

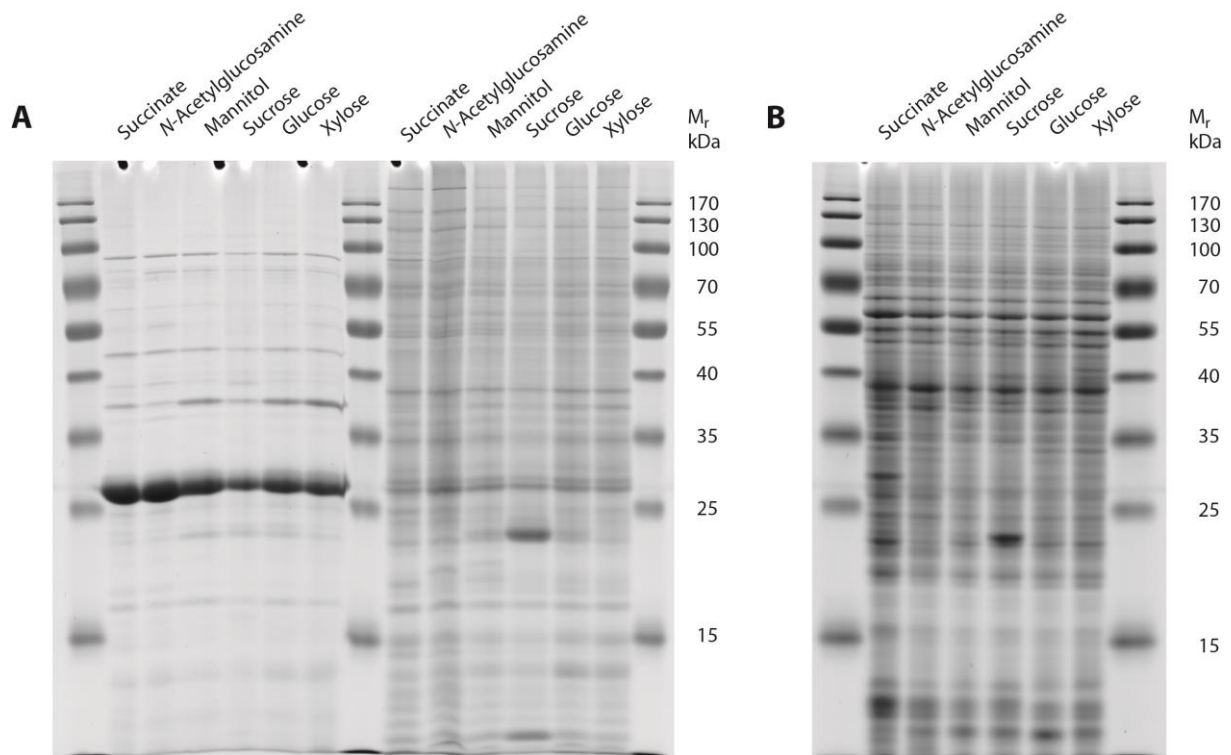

**FIG S8.** Separation of (A) outer (left) and cytoplasmic (right) membrane protein-enriched and (B) soluble fractions of *P. inhibens* DSM 17395 by SDS-PAGE. Substrate-adaptation conditions are indicated at the top of each lane.

**Central metabolism in *P. inhibens* DSM 17395 (FIGs. S8–S11)**

**1. Entner-Doudoroff pathway and lower branch of Embden-Meyerhof-Parnas pathway (FIG S9)**

**A**

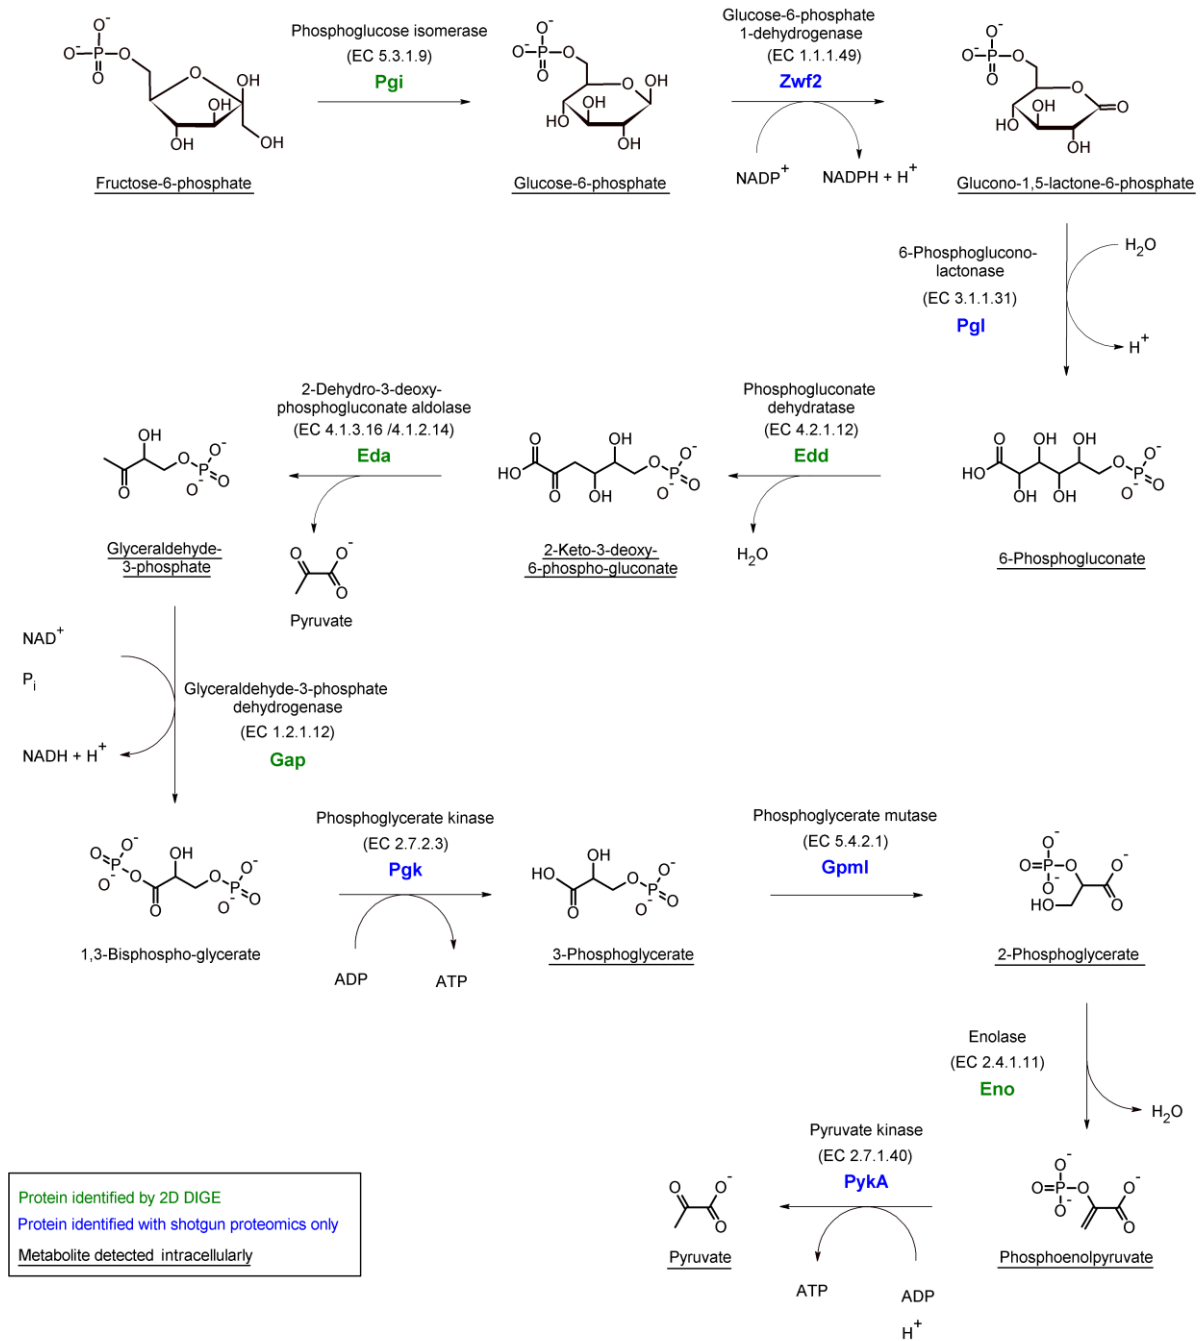

**B**
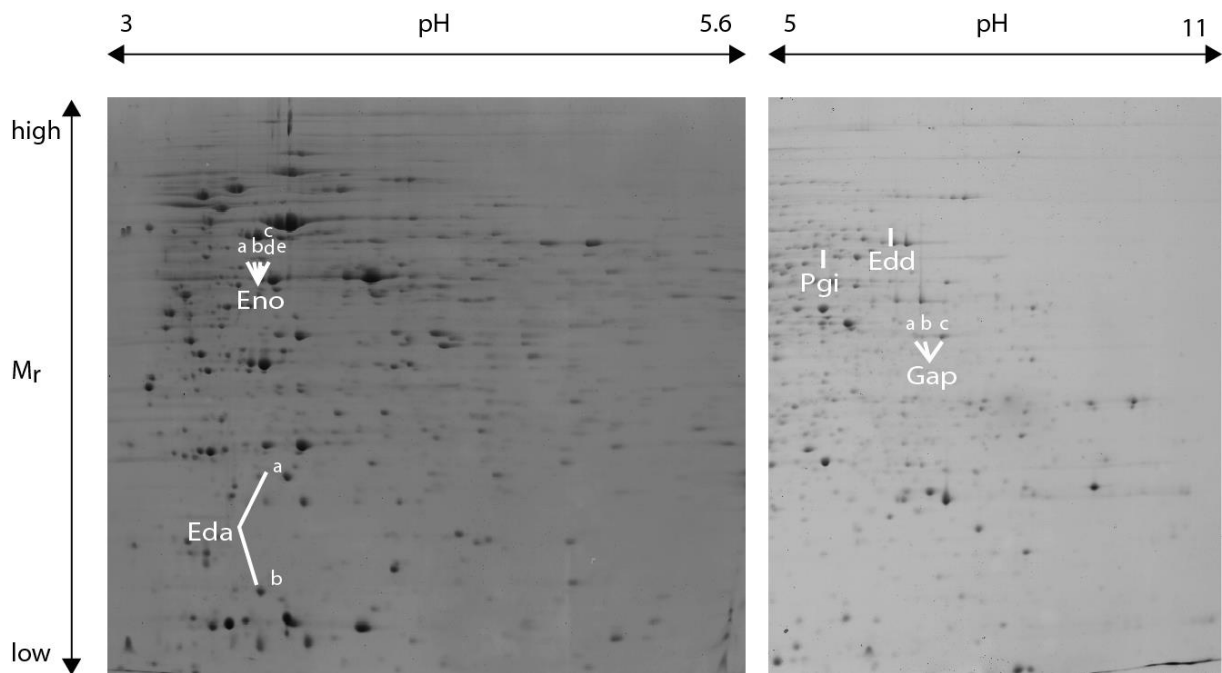
**C**

| Acc. No.<br>(PGA_)                                    | Name | Predicted function                       | Spot | % of cumulative<br>spot volume of<br>single protein | Fold change in abundance as compared to<br>succinate-adapted cells (2D DIGE) |      |      |      |      |
|-------------------------------------------------------|------|------------------------------------------|------|-----------------------------------------------------|------------------------------------------------------------------------------|------|------|------|------|
|                                                       |      |                                          |      |                                                     | NAG                                                                          | MTL  | SUCR | GLC  | XYL  |
| <b>CARBOHYDRATE METABOLISM</b>                        |      |                                          |      |                                                     |                                                                              |      |      |      |      |
| <i>Entner-Doudoroff pathway</i>                       |      |                                          |      |                                                     |                                                                              |      |      |      |      |
| c27980                                                | Pgi  | Glucose-6-phosphate isomerase            |      |                                                     | 5.0                                                                          | 3.5  | 6.4  | 6.2  | 3.4  |
| c28000                                                | Edd  | Phosphogluconate dehydratase             |      |                                                     | 8.6                                                                          | 6.5  | 9.0  | 9.3  | 6.5  |
| c28010                                                | Eda  | KHG/KDPG aldolase                        | a    | 23.1                                                | 6.6                                                                          | 4.1  | 5.3  | 6.3  | 3.9  |
| c28010                                                | Eda  | KHG/KDPG aldolase                        | b    | 76.9                                                | 1.4                                                                          | 1.7  | 2.1  | 1.9  | 1.0  |
| <i>Lower branch of Embden-Meyerhof-Parnas pathway</i> |      |                                          |      |                                                     |                                                                              |      |      |      |      |
| c27490                                                | Gap  | Glyceraldehyde-3-phosphate dehydrogenase | a    | 7.8                                                 | 1.4                                                                          | 1.9  | 2.3  | 2.2  | 2.6  |
| c27490                                                | Gap  | Glyceraldehyde-3-phosphate dehydrogenase | b    | 23.5                                                | 9.2                                                                          | 11.5 | 13.9 | 14.4 | 15.1 |
| c27490                                                | Gap  | Glyceraldehyde-3-phosphate dehydrogenase | c    | 68.7                                                | 10.7                                                                         | 13.6 | 14.7 | 16.6 | 16.6 |
| c11420                                                | Eno  | Enolase                                  | a    | 3.8                                                 | 1.5                                                                          | 2.5  | 3.4  | 2.2  | 4.1  |
| c11420                                                | Eno  | Enolase                                  | b    | 13.5                                                | 2.1                                                                          | 2.6  | 3.4  | 2.5  | 3.9  |
| c11420                                                | Eno  | Enolase                                  | c    | 59.0                                                | 2.0                                                                          | 2.4  | 2.6  | 2.3  | 3.1  |
| c11420                                                | Eno  | Enolase                                  | d    | 9.8                                                 | 2.0                                                                          | 2.3  | 2.6  | 2.2  | 3.1  |
| c11420                                                | Eno  | Enolase                                  | e    | 13.8                                                | 1.9                                                                          | 2.3  | 2.6  | 2.0  | 3.1  |
|                                                       |      |                                          |      |                                                     | Fold change    > - 1.5    > 1.5    > 5.0    > 10.0                           |      |      |      |      |

**FIG S9** Proteomic data and genomic predictions for the Entner-Doudoroff and lower branch of the Embden-Meyerhof-Parnas pathway of *P. inhibens* DSM 17395. (A) Enzymatic reactions of the Entner-Doudoroff and lower branch of Embden-Meyerhof-Parnas pathway. (B) 2DE gel image of succinate-adapted cells. Identified proteins of the Entner-Doudoroff and lower Embden-Meyerhof-Parnas pathway are marked. (C) Protein ID, predicted function, fold change in abundance of marked proteins and percentage share of each protein spot from the cumulative spot volume of a single protein. Abbreviations of adaptation substrates: NAG, *N*-acetylglucosamine; MTL, mannitol; SUCR, sucrose; GLC, glucose; XYL, xylose.

2. Pentose phosphate pathway (FIG S10)

A

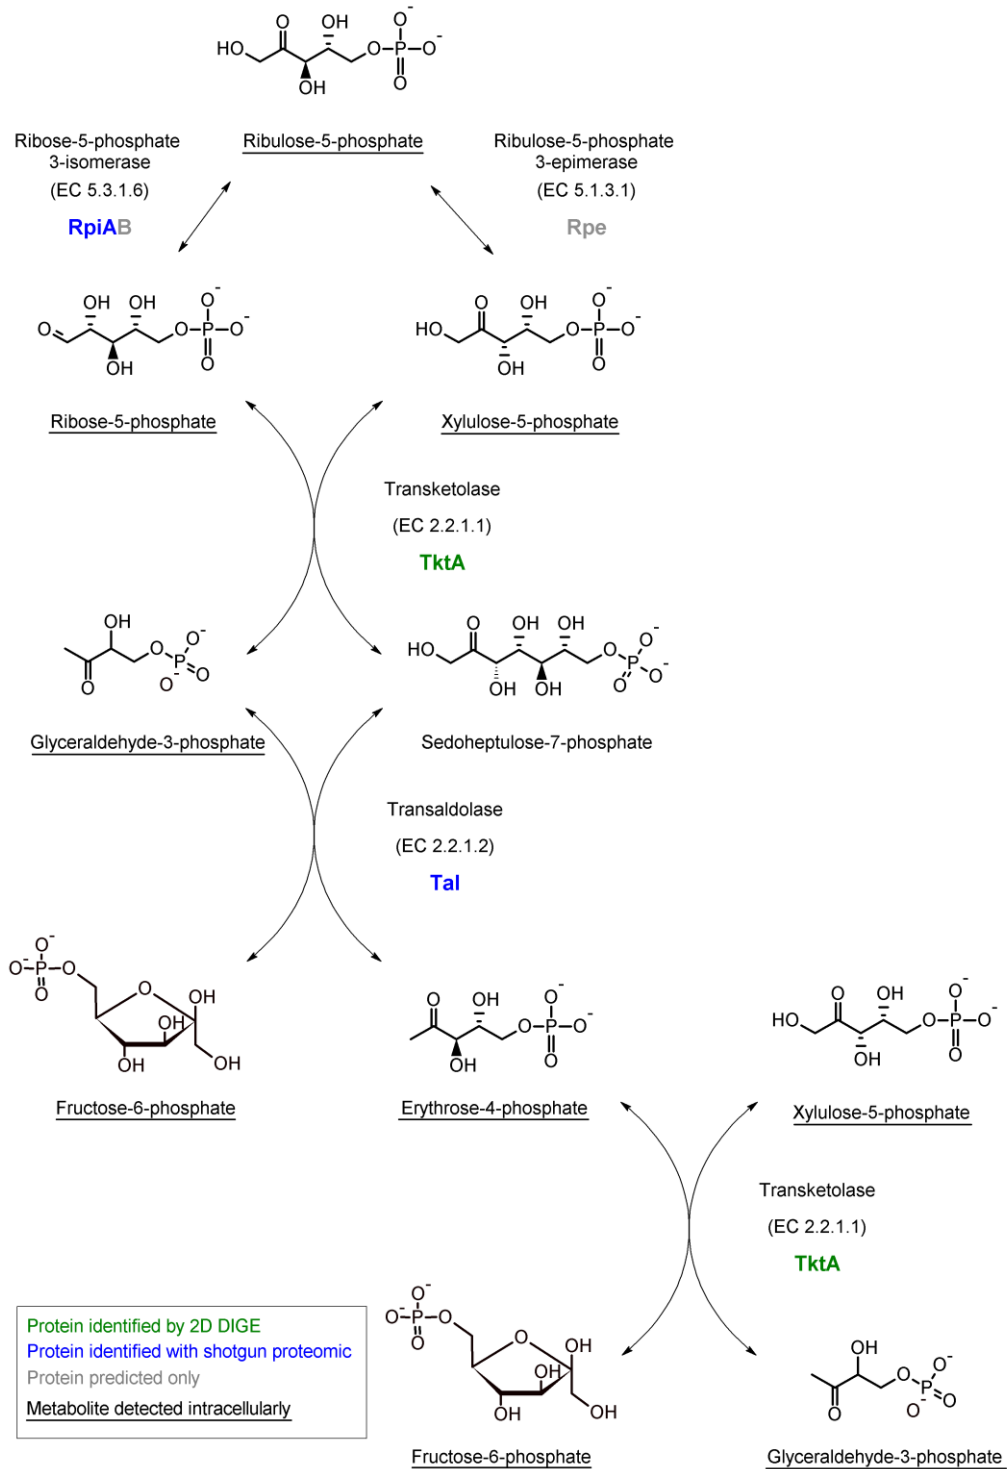



**B**

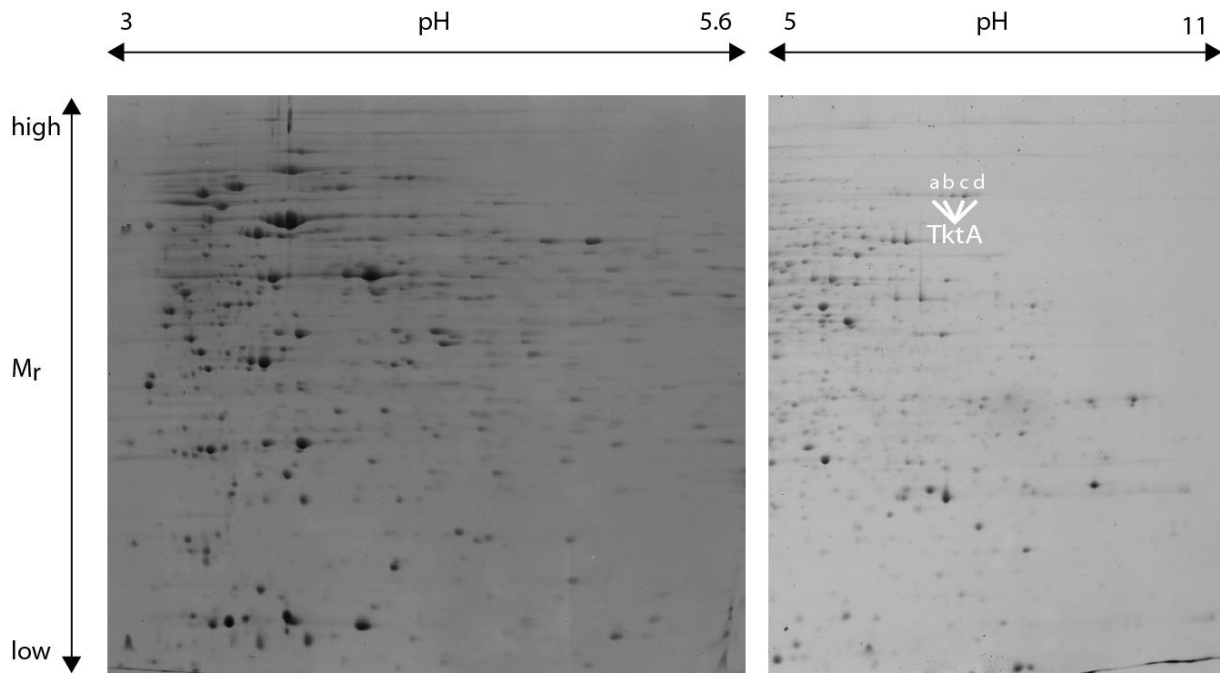

**C**

| Acc. No.<br>(PGA_)               | Name | Predicted function | Spot | % of cumulative<br>spot volume of<br>single protein | Fold change in abundance as compared to<br>succinate-adapted cells (2D DIGE) |      |      |      |     |
|----------------------------------|------|--------------------|------|-----------------------------------------------------|------------------------------------------------------------------------------|------|------|------|-----|
|                                  |      |                    |      |                                                     | NAG                                                                          | MTL  | SUCR | GLC  | XYL |
| <b>CARBOHYDRATE METABOLISM</b>   |      |                    |      |                                                     |                                                                              |      |      |      |     |
| <i>Pentose phosphate pathway</i> |      |                    |      |                                                     |                                                                              |      |      |      |     |
| c17230                           | TktA | Transketolase      | a    | 5.1                                                 | -1.1                                                                         | -1.2 | 1.1  | -1.1 | 1.7 |
| c17230                           | TktA | Transketolase      | b    | 9.0                                                 | -1.2                                                                         | -1.2 | -1.0 | -1.1 | 1.7 |
| c17230                           | TktA | Transketolase      | c    | 74.9                                                | -1.3                                                                         | -1.4 | -1.7 | -1.3 | 1.2 |
| c17230                           | TktA | Transketolase      | d    | 11.1                                                | -1.2                                                                         | -1.3 | -1.5 | -1.2 | 1.2 |
|                                  |      |                    |      |                                                     | Fold change    <-1.5   >-1.5   >1.5                                          |      |      |      |     |

**FIG S10** Proteomic data and genomic predictions for the pentose phosphate pathway of *P. inhibens* DSM 17395. (A) Enzymatic reactions of the pentose phosphate pathway. (B) 2DE gel image of succinate-adapted cells. Identified proteins of the pentose phosphate pathway are marked. (C) Protein ID, predicted function, fold change in abundance of marked proteins and percentage share of each protein spot from the cumulative spot volume of a single protein. Abbreviations of adaptation substrates: NAG, *N*-acetylglucosamine; MTL, mannitol; SUCR, sucrose; GLC, glucose; XYL, xylose.

3. Pyruvate dehydrogenase complex and TCA cycle (FIG S11)

A

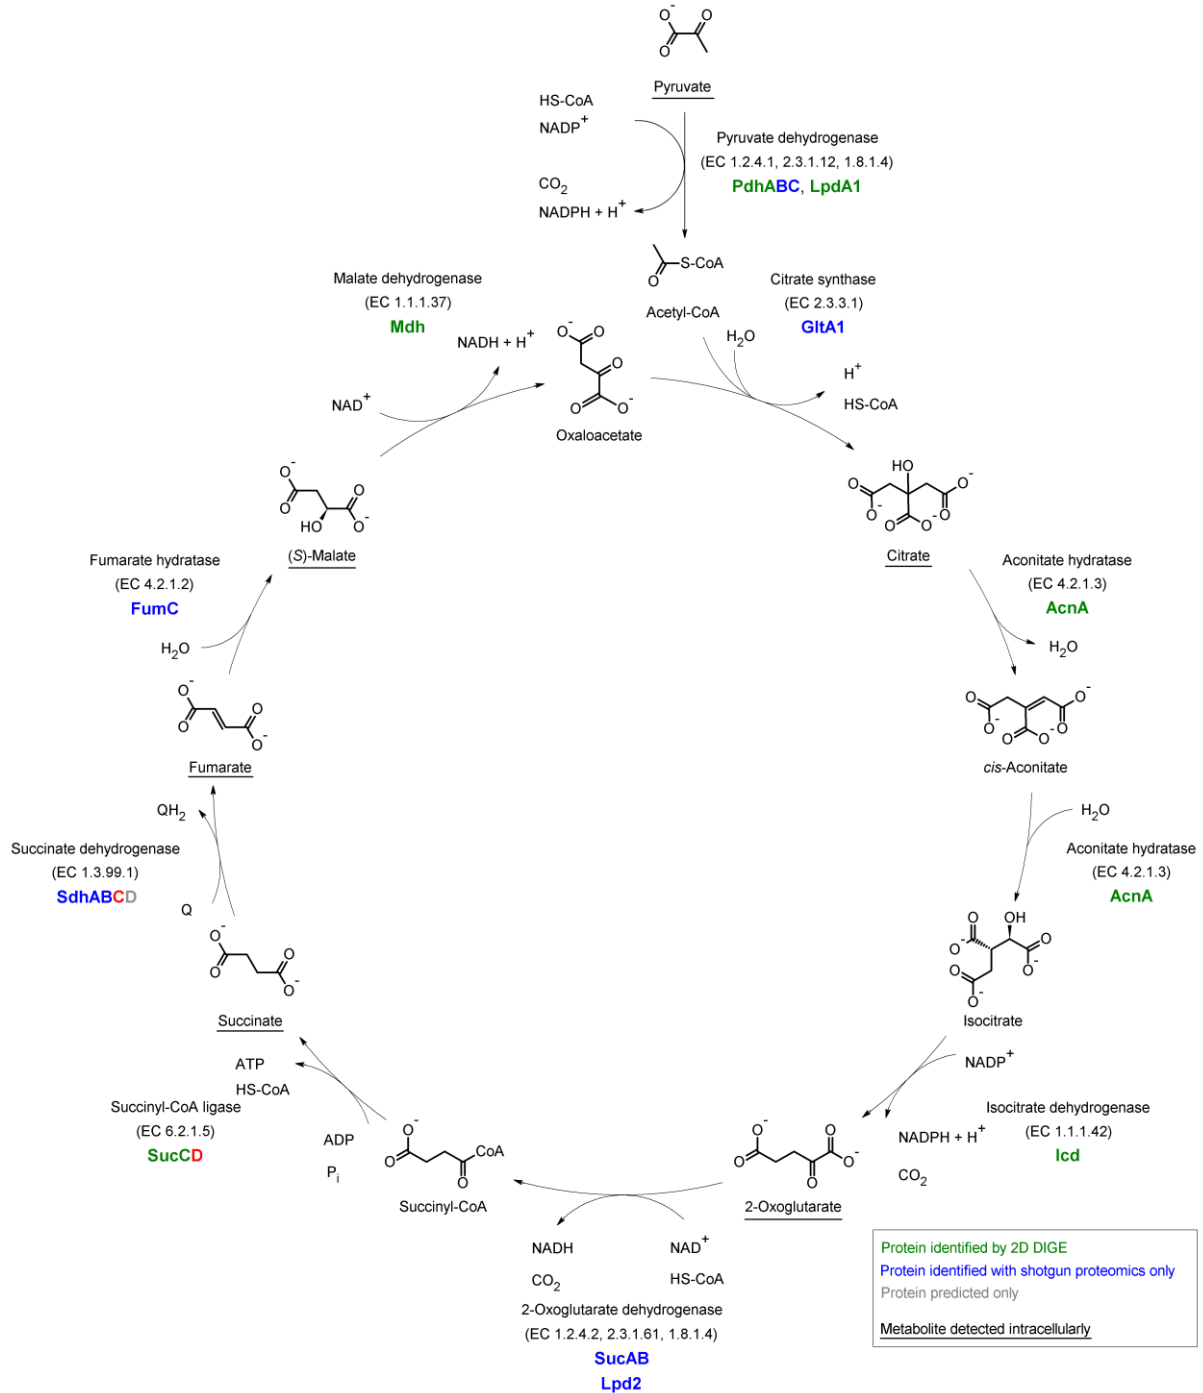

**B**

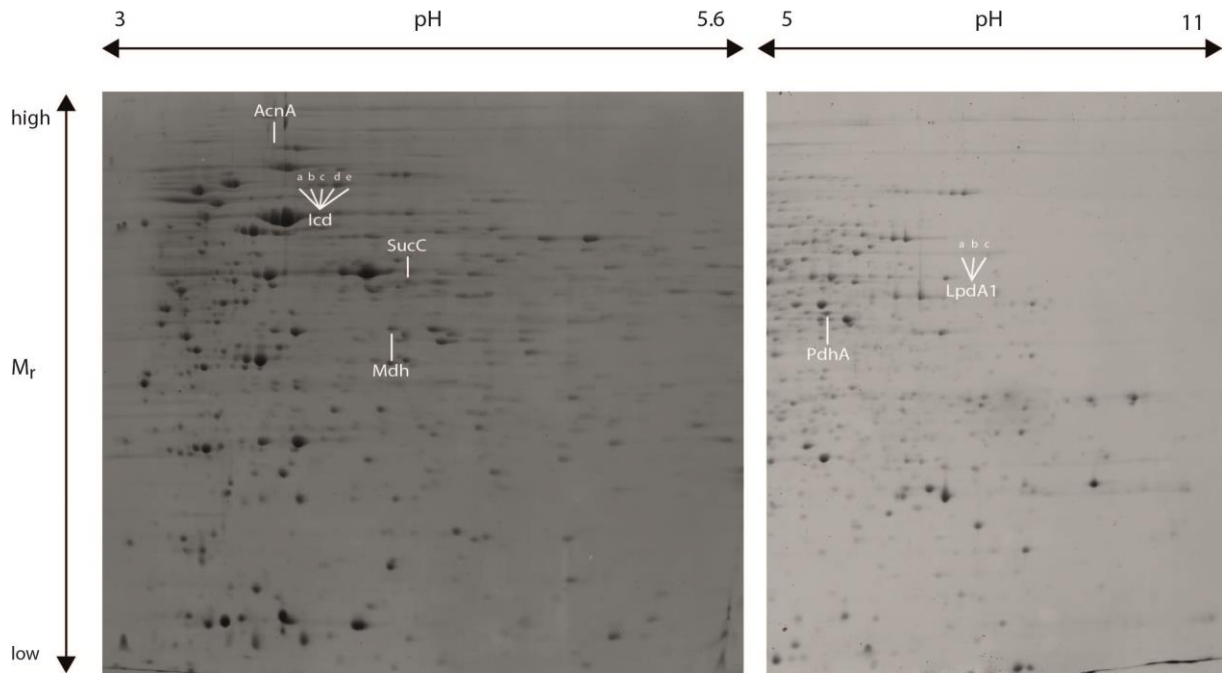

**C**

| Acc. No.<br>(PGA_)                    | Name               | Predicted function                                    | Spot | % of cumulative<br>spot volume of<br>single protein | Fold change in abundance as compared to<br>succinate-adapted cells (2D DIGE)                                                                                                         |      |      |      |      |
|---------------------------------------|--------------------|-------------------------------------------------------|------|-----------------------------------------------------|--------------------------------------------------------------------------------------------------------------------------------------------------------------------------------------|------|------|------|------|
|                                       |                    |                                                       |      |                                                     | NAG                                                                                                                                                                                  | MTL  | SUCR | GLC  | XYL  |
| <b>CARBOHYDRATE METABOLISM</b>        |                    |                                                       |      |                                                     |                                                                                                                                                                                      |      |      |      |      |
| <i>Pyruvate dehydrogenase complex</i> |                    |                                                       |      |                                                     |                                                                                                                                                                                      |      |      |      |      |
| c17550                                | PdhA               | Pyruvate dehydrogenase, E1 alpha subunit <sup>a</sup> |      |                                                     | -1.3                                                                                                                                                                                 | -1.0 | 1.1  | -1.1 | -1.6 |
| c17390                                | LpdA1 <sup>a</sup> | Dihydrolipoyl dehydrogenase <sup>a</sup>              | a    | 8.3                                                 | -2.0                                                                                                                                                                                 | 1.2  | 2.0  | 1.1  | -1.0 |
| c17390                                | LpdA1 <sup>a</sup> | Dihydrolipoyl dehydrogenase <sup>a</sup>              | b    | 24.0                                                | -2.3                                                                                                                                                                                 | 1.1  | 1.6  | -1.1 | -1.5 |
| c17390                                | LpdA1 <sup>a</sup> | Dihydrolipoyl dehydrogenase <sup>a</sup>              | c    | 67.7                                                | -2.3                                                                                                                                                                                 | 1.1  | 1.4  | -1.1 | -1.8 |
| <i>TCA cycle</i>                      |                    |                                                       |      |                                                     |                                                                                                                                                                                      |      |      |      |      |
| c18830                                | AcnA               | Aconitate hydratase                                   |      |                                                     | 1.6                                                                                                                                                                                  | -1.3 | 1.2  | -1.0 | 1.6  |
| c28340                                | Icd                | Isocitrate dehydrogenase [NADP]                       | a    | 2.0                                                 | 1.4                                                                                                                                                                                  | -1.4 | 1.6  | -1.1 | 1.3  |
| c28340                                | Icd                | Isocitrate dehydrogenase [NADP]                       | b    | 4.9                                                 | 1.6                                                                                                                                                                                  | -1.1 | 1.8  | -1.1 | 1.5  |
| c28340                                | Icd                | Isocitrate dehydrogenase [NADP]                       | c    | 18.1                                                | 1.5                                                                                                                                                                                  | -1.3 | 1.1  | -1.3 | 1.1  |
| c28340                                | Icd                | Isocitrate dehydrogenase [NADP]                       | d    | 63.1                                                | 1.6                                                                                                                                                                                  | -1.3 | -1.1 | -1.4 | -1.0 |
| c28340                                | Icd                | Isocitrate dehydrogenase [NADP]                       | e    | 11.9                                                | 1.6                                                                                                                                                                                  | -1.4 | -1.2 | -1.4 | -1.1 |
| c03630                                | SucC               | Succinyl-CoA ligase [ADP-forming], subunit beta       |      |                                                     | -1.3                                                                                                                                                                                 | -1.5 | 1.1  | -1.6 | -1.7 |
| c03650                                | Mdh                | Malate dehydrogenase                                  |      |                                                     | -1.0                                                                                                                                                                                 | 1.0  | 1.1  | 1.1  | 1.6  |
|                                       |                    |                                                       |      |                                                     | Fold change <span style="background-color: yellow;">&lt; -1.5</span> <span style="background-color: orange;">&gt; -1.5</span> <span style="background-color: green;">&gt; 1.5</span> |      |      |      |      |

<sup>a</sup> Annotation refinement (see Supplementary TABLE S3).

**FIG S11** Proteomic data and genomic predictions for the pyruvate dehydrogenase complex and TCA cycle of *P. inhibens* DSM 17395. (A) Enzymatic reactions of the TCA cycle. (B) 2DE gel image of succinate-adapted cells. Identified proteins of the TCA cycle are marked. (C) Protein ID, predicted function, fold change in abundance of marked proteins and percentage share of each protein spot from the cumulative spot volume of a single protein. Abbreviations of adaptation substrates: NAG, *N*-acetylglucosamine; MTL, mannitol; SUCR, sucrose; GLC, glucose; XYL, xylose.

4. Gluconeogenesis (FIG S12)

A

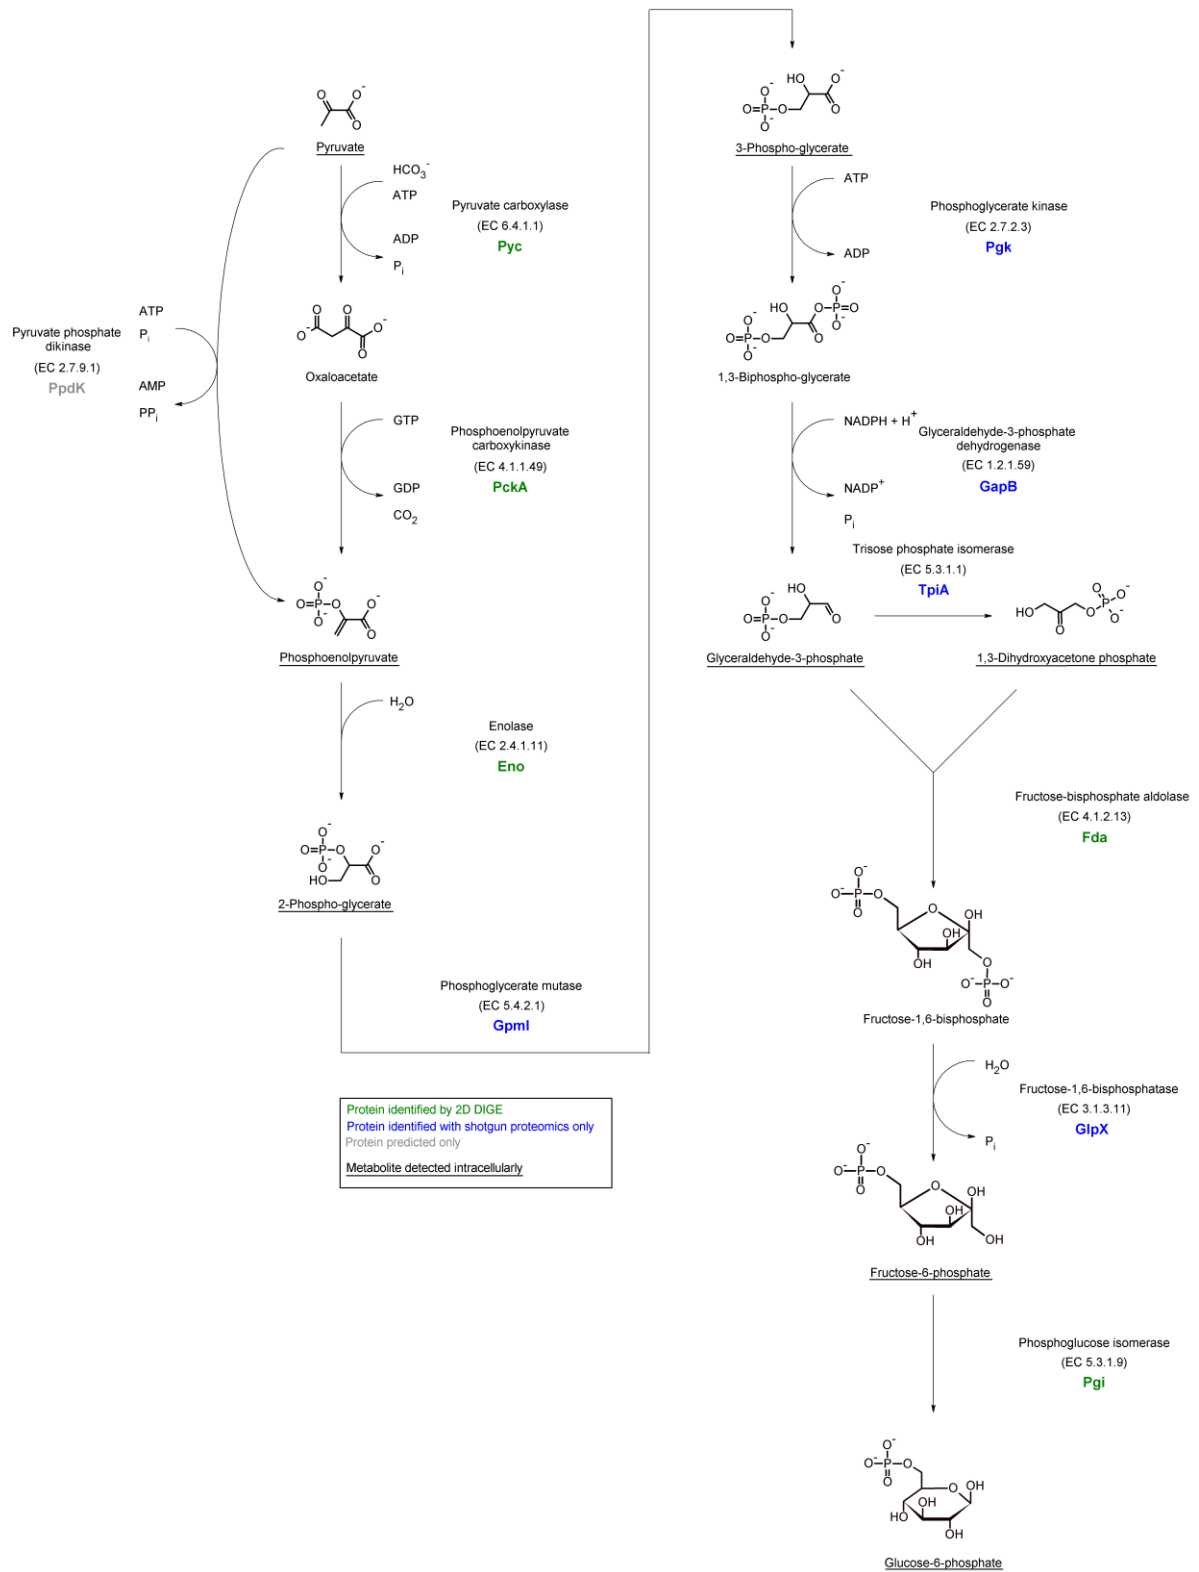

**B**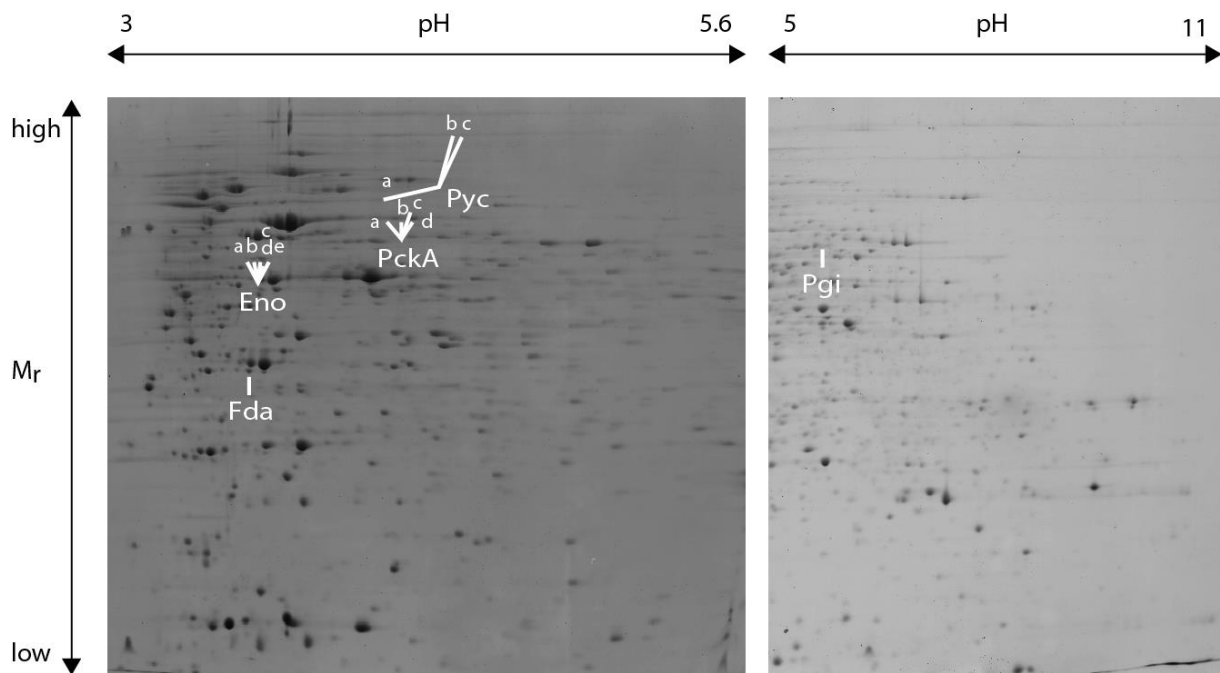**C**

| Acc. No.<br>(PGA_)             | Name | Predicted function                     | Spot | % of cumulative<br>spot volume of<br>single protein | Fold change in abundance as compared to<br>succinate-adapted cells (2D DIGE) |        |       |       |        |
|--------------------------------|------|----------------------------------------|------|-----------------------------------------------------|------------------------------------------------------------------------------|--------|-------|-------|--------|
|                                |      |                                        |      |                                                     | NAG                                                                          | MTL    | SUCR  | GLC   | XYL    |
| <b>CARBOHYDRATE METABOLISM</b> |      |                                        |      |                                                     |                                                                              |        |       |       |        |
| <b>Gluconeogenesis</b>         |      |                                        |      |                                                     |                                                                              |        |       |       |        |
| c09420                         | Pyc  | Pyruvate carboxylase                   | a    | 73.6                                                | 1.1                                                                          | -1.3   | -1.3  | -1.5  | -1.2   |
| c09420                         | Pyc  | Pyruvate carboxylase                   | b    | 6.7                                                 | -1.1                                                                         | 1.1    | 1.4   | 1.3   | 1.6    |
| c09420                         | Pyc  | Pyruvate carboxylase                   | c    | 19.6                                                | -1.0                                                                         | 1.3    | 1.3   | 1.5   | 1.5    |
| c01140                         | PckA | Phosphoenolpyruvate carboxykinase      | a    | 15.4                                                | -1.1                                                                         | -2.4   | -1.6  | -2.1  | -2.0   |
| c01140                         | PckA | Phosphoenolpyruvate carboxykinase      | b    | 14.2                                                | -1.5                                                                         | -1.8   | -1.4  | -1.5  | -1.5   |
| c01140                         | PckA | Phosphoenolpyruvate carboxykinase      | c    | 22.2                                                | -1.6                                                                         | -1.7   | -1.8  | -1.7  | -1.7   |
| c01140                         | PckA | Phosphoenolpyruvate carboxykinase      | d    | 48.1                                                | -4.0                                                                         | -3.4   | -3.0  | -2.9  | -3.6   |
| c11420                         | Eno  | Enolase                                | a    | 3.8                                                 | 1.5                                                                          | 2.5    | 3.4   | 2.2   | 4.1    |
| c11420                         | Eno  | Enolase                                | b    | 13.5                                                | 2.1                                                                          | 2.6    | 3.4   | 2.5   | 3.9    |
| c11420                         | Eno  | Enolase                                | c    | 59.0                                                | 2.0                                                                          | 2.4    | 2.6   | 2.3   | 3.1    |
| c11420                         | Eno  | Enolase                                | d    | 9.8                                                 | 2.0                                                                          | 2.3    | 2.6   | 2.2   | 3.1    |
| c11420                         | Eno  | Enolase                                | e    | 13.8                                                | 1.9                                                                          | 2.3    | 2.6   | 2.0   | 3.1    |
| c23910                         | Fda  | Fructose-bisphosphate aldolase class 1 |      |                                                     | -2.7                                                                         | -3.3   | -3.6  | -3.4  | -2.6   |
| c27980                         | Pgi  | Glucose-6-phosphate isomerase          |      |                                                     | 5.0                                                                          | 3.5    | 6.4   | 6.2   | 3.4    |
| <b>Fold change</b>             |      |                                        |      |                                                     | < -1.5                                                                       | > -1.5 | > 1.5 | > 5.0 | > 10.0 |

**FIG S12** Proteomic data and genomic predictions for the gluconeogenesis of *P. inhibens* DSM 17395. (A) Gluconeogenesis. (B) 2DE gel image of succinate-adapted cells. Identified proteins of gluconeogenesis are marked. (C) Protein ID, predicted function, fold change in abundance of marked proteins and percentage share of each protein spot from the cumulative spot volume of a single protein. Abbreviations of adaptation substrates: NAG, *N*-acetylglucosamine; MTL, mannitol; SUCR, sucrose; GLC, glucose; XYL, xylose.

---

**References**

- Newton, RJ, Griffin, LE, Bowles, KM, Meile, C, Gifford, S, Givens, CE., Howard, EC, King, E, Oakley, CA, Reisch, CR, Rinta-Kanto, JM, Sharma, S, Sun, S, Varaljay, V, Vila-Costa, M, Westrich, JR, and Moran, MA.** 2010. Genome characteristics of a generalist marine bacterial lineage. *ISME J.* **4**:784–798
- Thole S, Kalhöfer D, Voget S, Berger M, Engelhardt T, Liesegang H, Wollherr A, Kjelleberg S, Daniel R, Simon M, Thomas T, Brinkhoff T.** 2012. *Phaeobacter gallaeciensis* genomes from globally opposite locations reveal high similarity of adaptation to surface life. *ISME J.* **6**:2229–2244.
